# Supplementary material
Source: Research Square preprint supplement (doi:10.21203/rs.3.rs-8455901/v1)
Supplement: Supplementary file 1 [file 0bd2feb13cd249c43cdbc447.xlsx]

## Sheet: Statistics of tumor weight
Record of tumor weight in tumor-bearing mice
No.	1	2	3	4	5	6	7	8	9	10	Average	SD	Tumor inhibition rate (%)
Model	0.6609	1.207	0.8631	0.6494	0.6441	0.8097	0.5305	1.8737	0.4851	0.7471	0.84706	0.413835
Huaier	0.7413	0.5479	0.3585	0.3007	0.3421	0.4069	/	/	0.5702	0.5566	0.478025	0.1503	43.5666
Adriamycin	0.0779	0.1335	0.1992	0.1491	0.0918	0.0707	0.1353	0.2202	0.1993	0.104	0.1381	0.0535852	83.6966
High-dose	0.1255	0.0779	0.1217	0.2042	0.1491	0.0924	0.2427	0.2749	0.1861	0.2498	0.17243	0.0693472	79.6437
Middle-dose	0.2213	0.2943	0.2458	0.2117	0.2791	0.359	0.3023	0.2396	0.3241	0.2739	0.27511	0.0466653	67.5218
Low-dose	0.3534	0.3691	0.4032	0.41554	0.442	0.4478	0.4494	0.4953	0.6447	1.0039	0.502434	0.193963	40.685
