# Supplementary material
Source: Research Square preprint supplement (doi:10.21203/rs.3.rs-8455901/v1)
Supplement: Supplementary file 2 [file 1d47b5bb23c7ef98e21577cb.xlsx]

## Sheet: Table S5 glycolysis related tar
Table S2 The top 1000 liver cancer related targets collected from GeneCards
Gene Symbol	Description	Gifts
BRCA2	BRCA2 DNA Repair Associated	61
BRCA1	BRCA1 DNA Repair Associated	63
ATM	ATM Serine/Threonine Kinase	66
TP53	Tumor Protein P53	66
PALB2	Partner And Localizer Of BRCA2	57
APC	APC Regulator Of WNT Signaling Pathway	62
CHEK2	Checkpoint Kinase 2	67
BRIP1	BRCA1 Interacting DNA Helicase 1	61
MSH6	MutS Homolog 6	61
MSH2	MutS Homolog 2	61
MLH1	MutL Homolog 1	62
CDH1	Cadherin 1	62
BARD1	BRCA1 Associated RING Domain 1	60
PKHD1	PKHD1 Ciliary IPT Domain Containing Fibrocystin/Polyductin	50
PMS2	PMS1 Homolog 2, Mismatch Repair System Component	61
C11orf65	Chromosome 11 Open Reading Frame 65	42
EGFR	Epidermal Growth Factor Receptor	68
PTEN	Phosphatase And Tensin Homolog	65
NF1	Neurofibromin 1	61
MET	MET Proto-Oncogene, Receptor Tyrosine Kinase	67
TSC2	TSC Complex Subunit 2	64
POLD1	DNA Polymerase Delta 1, Catalytic Subunit	60
RAD50	RAD50 Double Strand Break Repair Protein	62
CDKN2A	Cyclin Dependent Kinase Inhibitor 2A	64
AXIN2	Axin 2	62
POLE	DNA Polymerase Epsilon, Catalytic Subunit	61
STK11	Serine/Threonine Kinase 11	62
KRAS	KRAS Proto-Oncogene, GTPase	66
SMAD4	SMAD Family Member 4	65
RET	Ret Proto-Oncogene	67
ALK	ALK Receptor Tyrosine Kinase	64
NBN	Nibrin	61
PIK3CA	Phosphatidylinositol-4,5-Bisphosphate 3-Kinase Catalytic Subunit Alpha	65
CTNNB1	Catenin Beta 1	67
BRAF	B-Raf Proto-Oncogene, Serine/Threonine Kinase	67
PKD1	Polycystin 1, Transient Receptor Potential Channel Interacting	58
RB1	RB Transcriptional Corepressor 1	61
BAP1	BRCA1 Associated Deubiquitinase 1	60
LOC126862571	BRD4-Independent Group 4 Enhancer GRCh37_chr17:41243136-41244335	11
KIT	KIT Proto-Oncogene, Receptor Tyrosine Kinase	66
MUTYH	MutY DNA Glycosylase	58
SMARCA4	SWI/SNF Related BAF Chromatin Remodeling Complex Subunit ATPase 4	64
TSC1	TSC Complex Subunit 1	61
ERBB2	Erb-B2 Receptor Tyrosine Kinase 2	68
DICER1	Dicer 1, Ribonuclease III	61
PTCH1	Patched 1	64
BLM	BLM RecQ Like Helicase	62
RAD51D	RAD51 Paralog D	53
AKT1	AKT Serine/Threonine Kinase 1	66
RAD51C	RAD51 Paralog C	57
PDGFRA	Platelet Derived Growth Factor Receptor Alpha	66
MSH3	MutS Homolog 3	55
EPCAM	Epithelial Cell Adhesion Molecule	61
FH	Fumarate Hydratase	59
TERT	Telomerase Reverse Transcriptase	64
BMPR1A	Bone Morphogenetic Protein Receptor Type 1A	65
H19	H19 Imprinted Maternally Expressed Transcript	37
RAD51L3-RFFL	RAD51L3-RFFL Readthrough	17
MRE11	MRE11 Homolog, Double Strand Break Repair Nuclease	61
FLCN	Folliculin	55
CCND1	Cyclin D1	65
SDHA	Succinate Dehydrogenase Complex Flavoprotein Subunit A	61
CDK4	Cyclin Dependent Kinase 4	67
MEN1	Menin 1	59
VHL	Von Hippel-Lindau Tumor Suppressor	60
FANCC	FA Complementation Group C	60
MIR21	MicroRNA 21	33
HRAS	HRas Proto-Oncogene, GTPase	65
CTNNA1	Catenin Alpha 1	60
CDKN1B	Cyclin Dependent Kinase Inhibitor 1B	61
FGFR2	Fibroblast Growth Factor Receptor 2	68
ESR1	Estrogen Receptor 1	67
AR	Androgen Receptor	65
FGFR3	Fibroblast Growth Factor Receptor 3	68
SDHB	Succinate Dehydrogenase Complex Iron Sulfur Subunit B	61
MYC	MYC Proto-Oncogene, BHLH Transcription Factor	65
NRAS	NRAS Proto-Oncogene, GTPase	64
RUNX1	RUNX Family Transcription Factor 1	62
STAT3	Signal Transducer And Activator Of Transcription 3	67
GAS5	Growth Arrest Specific 5	32
MALAT1	Metastasis Associated Lung Adenocarcinoma Transcript 1	33
LZTR1	Leucine Zipper Like Post Translational Regulator 1	55
ATR	ATR Serine/Threonine Kinase	67
PPARG	Peroxisome Proliferator Activated Receptor Gamma	65
CASP8	Caspase 8	65
PVT1	Pvt1 Oncogene	33
HOXB13	Homeobox B13	54
NF2	NF2, Moesin-Ezrin-Radixin Like (MERLIN) Tumor Suppressor	62
HULC	Hepatocellular Carcinoma Up-Regulated Long Non-Coding RNA	29
HOTAIR	HOX Transcript Antisense RNA	31
UCA1	Urothelial Cancer Associated 1	30
NTHL1	Nth Like DNA Glycosylase 1	55
ARID1A	AT-Rich Interaction Domain 1A	58
NOTCH1	Notch Receptor 1	66
MEG3	Maternally Expressed 3	37
SRC	SRC Proto-Oncogene, Non-Receptor Tyrosine Kinase	64
MLH3	MutL Homolog 3	53
MIR34A	MicroRNA 34a	31
TGFBR2	Transforming Growth Factor Beta Receptor 2	65
MIR17	MicroRNA 17	28
PRKCSH	PRKCSH Beta Subunit Of Glucosidase II	57
SDHC	Succinate Dehydrogenase Complex Subunit C	55
SDHD	Succinate Dehydrogenase Complex Subunit D	58
PKD2	Polycystin 2, Transient Receptor Potential Cation Channel	61
SEC63	SEC63 Homolog, Protein Translocation Regulator	55
MIR7-3HG	MIR7-3 Host Gene	34
FGFR1	Fibroblast Growth Factor Receptor 1	68
TGFB1	Transforming Growth Factor Beta 1	65
LRP5	LDL Receptor Related Protein 5	62
POT1	Protection Of Telomeres 1	55
SMARCB1	SWI/SNF Related BAF Chromatin Remodeling Complex Subunit B1	59
DLC1	DLC1 Rho GTPase Activating Protein	56
HNF1A	HNF1 Homeobox A	60
TUG1	Taurine Up-Regulated 1	34
MIR125A	MicroRNA 125a	30
MIR30A	MicroRNA 30a	28
MIR126	MicroRNA 126	31
MIR145	MicroRNA 145	32
IL6	Interleukin 6	64
CCAT1	Colon Cancer Associated Transcript 1	23
MDM2	MDM2 Proto-Oncogene	67
MIR27A	MicroRNA 27a	32
MIR122	MicroRNA 122	30
TNF	Tumor Necrosis Factor	65
MIR31	MicroRNA 31	29
MIR155	MicroRNA 155	30
CDC73	Cell Division Cycle 73	58
PCAT1	Prostate Cancer Associated Transcript 1	26
HNF1B	HNF1 Homeobox B	55
XRCC2	X-Ray Repair Cross Complementing 2	52
MIRLET7C	MicroRNA Let-7c	31
CCAT2	Colon Cancer Associated Transcript 2	22
PRKAR1A	Protein Kinase CAMP-Dependent Type I Regulatory Subunit Alpha	64
GREM1	Gremlin 1, DAN Family BMP Antagonist	57
MIR221	MicroRNA 221	29
CDKN2B-AS1	CDKN2B And CDKN2A Antisense Cis And Trans Regulatory RNA 1	32
MIR143	MicroRNA 143	32
MIR214	MicroRNA 214	31
MARS1	Methionyl-TRNA Synthetase 1	58
MIR200B	MicroRNA 200b	30
MAP2K1	Mitogen-Activated Protein Kinase Kinase 1	67
MIR29A	MicroRNA 29a	31
AOPEP	Aminopeptidase O (Putative)	49
SUFU	SUFU Negative Regulator Of Hedgehog Signaling	55
WT1	WT1 Transcription Factor	61
HIF1A	Hypoxia Inducible Factor 1 Subunit Alpha	61
RAD51	RAD51 Recombinase	65
HFE	Homeostatic Iron Regulator	58
NEAT1	Nuclear Paraspeckle Assembly Transcript 1	34
ERBB4	Erb-B2 Receptor Tyrosine Kinase 4	67
ERCC2	ERCC Excision Repair 2, TFIIH Core Complex Helicase Subunit	61
MIR200C	MicroRNA 200c	31
FAS	Fas Cell Surface Death Receptor	64
NTRK1	Neurotrophic Receptor Tyrosine Kinase 1	62
MIR146A	MicroRNA 146a	31
HNF4A	Hepatocyte Nuclear Factor 4 Alpha	62
MIR203A	MicroRNA 203a	28
IDH1	Isocitrate Dehydrogenase (NADP(+)) 1	65
VEGFA	Vascular Endothelial Growth Factor A	61
MIR200A	MicroRNA 200a	29
GANAB	Glucosidase II Alpha Subunit	58
MIR141	MicroRNA 141	30
PIK3R1	Phosphoinositide-3-Kinase Regulatory Subunit 1	65
IL1B	Interleukin 1 Beta	60
MIR22	MicroRNA 22	31
EP300	E1A Binding Protein P300	65
FANCM	FA Complementation Group M	55
BAX	BCL2 Associated X, Apoptosis Regulator	64
RAF1	Raf-1 Proto-Oncogene, Serine/Threonine Kinase	67
MIR222	MicroRNA 222	29
MIR20A	MicroRNA 20a	29
BCL2	BCL2 Apoptosis Regulator	64
ERBB3	Erb-B2 Receptor Tyrosine Kinase 3	67
MIR223	MicroRNA 223	30
CHEK1	Checkpoint Kinase 1	65
MIR195	MicroRNA 195	28
MIR183	MicroRNA 183	28
MIR148A	MicroRNA 148a	29
FANCD2	FA Complementation Group D2	60
MIR182	MicroRNA 182	30
MIR10B	MicroRNA 10b	31
CASC2	Cancer Susceptibility 2	34
MIR205	MicroRNA 205	28
JUN	Jun Proto-Oncogene, AP-1 Transcription Factor Subunit	62
RECQL4	RecQ Like Helicase 4	54
PNPLA3	Patatin Like Domain 3, 1-Acylglycerol-3-Phosphate O-Acyltransferase	54
MTOR	Mechanistic Target Of Rapamycin Kinase	68
PTPN11	Protein Tyrosine Phosphatase Non-Receptor Type 11	67
MIRLET7D	MicroRNA Let-7d	31
MIR150	MicroRNA 150	30
TRMU	TRNA Mitochondrial 2-Thiouridylase	51
FASLG	Fas Ligand	61
BUB1B	BUB1 Mitotic Checkpoint Serine/Threonine Kinase B	63
SMO	Smoothened, Frizzled Class Receptor	64
AXIN1	Axin 1	60
GNAS	GNAS Complex Locus	63
MIR15A	MicroRNA 15a	25
GPC3	Glypican 3	59
MIR140	MicroRNA 140	32
MIR29C	MicroRNA 29c	27
MUC1	Mucin 1, Cell Surface Associated	61
ABCB1	ATP Binding Cassette Subfamily B Member 1	64
IDH2	Isocitrate Dehydrogenase (NADP(+)) 2	65
CDKN1A	Cyclin Dependent Kinase Inhibitor 1A	63
PMS1	PMS1 Homolog 1, Mismatch Repair System Component	52
FANCA	FA Complementation Group A	62
SERPINA1	Serpin Family A Member 1	62
MIR106B	MicroRNA 106b	30
TMEM127	Transmembrane Protein 127	50
IGF2	Insulin Like Growth Factor 2	61
MUC16	Mucin 16, Cell Surface Associated	51
MIR191	MicroRNA 191	30
INS	Insulin	61
MIR146B	MicroRNA 146b	29
MIR139	MicroRNA 139	30
MIR18A	MicroRNA 18a	28
YAP1	Yes1 Associated Transcriptional Regulator	61
GYS2	Glycogen Synthase 2	57
NRG1	Neuregulin 1	61
MIR181A1	MicroRNA 181a-1	27
ATP7B	ATPase Copper Transporting Beta	61
RINT1	RAD50 Interactor 1	50
MIRLET7B	MicroRNA Let-7b	29
FBXW7	F-Box And WD Repeat Domain Containing 7	58
MIR23A	MicroRNA 23a	30
AIP	AHR Interacting HSP90 Co-Chaperone	56
ALB	Albumin	61
MIR27B	MicroRNA 27b	30
KDR	Kinase Insert Domain Receptor	67
DHFR	Dihydrofolate Reductase	61
CCNE1	Cyclin E1	61
MIR30E	MicroRNA 30e	31
EZH2	Enhancer Of Zeste 2 Polycomb Repressive Complex 2 Subunit	66
ERCC5	ERCC Excision Repair 5, Endonuclease	58
MIR127	MicroRNA 127	30
CD274	CD274 Molecule	58
NFE2L2	NFE2 Like BZIP Transcription Factor 2	64
MIR210	MicroRNA 210	30
CDKN2B	Cyclin Dependent Kinase Inhibitor 2B	59
MIR142	MicroRNA 142	30
MIR25	MicroRNA 25	29
SDHAF2	Succinate Dehydrogenase Complex Assembly Factor 2	54
KRT7	Keratin 7	55
XIST	X Inactive Specific Transcript	31
ROS1	ROS Proto-Oncogene 1, Receptor Tyrosine Kinase	60
ERCC4	ERCC Excision Repair 4, Endonuclease Catalytic Subunit	59
IFNG	Interferon Gamma	63
MSR1	Macrophage Scavenger Receptor 1	58
MIR224	MicroRNA 224	25
EGF	Epidermal Growth Factor	64
CEBPA	CCAAT Enhancer Binding Protein Alpha	60
CYP3A4	Cytochrome P450 Family 3 Subfamily A Member 4	61
KCNQ1OT1	KCNQ1 Opposite Strand/Antisense Transcript 1	35
MIR99A	MicroRNA 99a	30
JAK2	Janus Kinase 2	66
MIR451A	MicroRNA 451a	25
HGF	Hepatocyte Growth Factor	65
RNF43	Ring Finger Protein 43	50
KRT19	Keratin 19	57
NTRK2	Neurotrophic Receptor Tyrosine Kinase 2	66
AURKA	Aurora Kinase A	65
NTRK3	Neurotrophic Receptor Tyrosine Kinase 3	65
LMNA	Lamin A/C	63
MIR130A	MicroRNA 130a	30
CDK12	Cyclin Dependent Kinase 12	58
PIK3CG	Phosphatidylinositol-4,5-Bisphosphate 3-Kinase Catalytic Subunit Gamma	62
IL10	Interleukin 10	60
MAPK1	Mitogen-Activated Protein Kinase 1	65
MIR26A1	MicroRNA 26a-1	30
SPRY4-IT1	SPRY4 Intronic Transcript 1	21
MIR34C	MicroRNA 34c	30
SNHG1	Small Nucleolar RNA Host Gene 1	29
IL2	Interleukin 2	58
SPOP	Speckle Type BTB/POZ Protein	57
ITGB1	Integrin Subunit Beta 1	62
MIR93	MicroRNA 93	30
PHOX2B	Paired Like Homeobox 2B	56
NBAS	NBAS Subunit Of NRZ Tethering Complex	52
AFP	Alpha Fetoprotein	60
RAD51B	RAD51 Paralog B	52
CFTR	CF Transmembrane Conductance Regulator	66
CXCR4	C-X-C Motif Chemokine Receptor 4	65
VDR	Vitamin D Receptor	61
GSTM1	Glutathione S-Transferase Mu 1	55
MTHFR	Methylenetetrahydrofolate Reductase	61
MIR215	MicroRNA 215	27
LINC-ROR	Long Intergenic Non-Protein Coding RNA, Regulator Of Reprogramming	25
TH2LCRR	T Helper Type 2 Locus Control Region Associated RNA	21
ABCC1	ATP Binding Cassette Subfamily C Member 1 (ABCC1 Blood Group)	61
MIR23B	MicroRNA 23b	29
HOTTIP	HOXA Distal Transcript Antisense RNA	31
MIRLET7E	MicroRNA Let-7e	28
IL21R	Interleukin 21 Receptor	55
FLT1	Fms Related Receptor Tyrosine Kinase 1	64
CYP2E1	Cytochrome P450 Family 2 Subfamily E Member 1	58
NFKB1	Nuclear Factor Kappa B Subunit 1	66
MIR181B1	MicroRNA 181b-1	28
MIR199B	MicroRNA 199b	27
MIR199A1	MicroRNA 199a-1	29
UGT1A1	UDP Glucuronosyltransferase Family 1 Member A1	64
MIR19A	MicroRNA 19a	28
MIR96	MicroRNA 96	30
ZFAS1	ZNFX1 Antisense RNA 1	30
MIR107	MicroRNA 107	28
CYP2A6	Cytochrome P450 Family 2 Subfamily A Member 6	58
EGFR-AS1	EGFR Antisense RNA 1	24
IGF2R	Insulin Like Growth Factor 2 Receptor	60
MIR16-1	MicroRNA 16-1	30
ABCC2	ATP Binding Cassette Subfamily C Member 2	61
INSR	Insulin Receptor	67
MITF	Melanocyte Inducing Transcription Factor	61
WRN	WRN RecQ Like Helicase	60
GPT	Glutamic--Pyruvic Transaminase	55
FOXO1	Forkhead Box O1	64
MIR26B	MicroRNA 26b	31
MIRLET7G	MicroRNA Let-7g	28
AXL	AXL Receptor Tyrosine Kinase	64
NOTCH2	Notch Receptor 2	65
SMAD7	SMAD Family Member 7	57
MIR152	MicroRNA 152	30
CTLA4	Cytotoxic T-Lymphocyte Associated Protein 4	61
FOXM1	Forkhead Box M1	56
XPC	XPC Complex Subunit, DNA Damage Recognition And Repair Factor	58
ALG8	ALG8 Alpha-1,3-Glucosyltransferase	55
SMAD3	SMAD Family Member 3	66
MT-CYB	Mitochondrially Encoded Cytochrome B	45
AKT2	AKT Serine/Threonine Kinase 2	67
GATA3	GATA Binding Protein 3	63
MAX	MYC Associated Factor X	59
IL1RN	Interleukin 1 Receptor Antagonist	62
AFAP1-AS1	AFAP1 Antisense RNA 1	24
SMARCE1	SWI/SNF Related BAF Chromatin Remodeling Complex Subunit E1	58
IGF1	Insulin Like Growth Factor 1	61
FANCI	FA Complementation Group I	54
TYMS	Thymidylate Synthetase	62
HNF1A-AS1	HNF1A Antisense RNA 1	28
MIR125B1	MicroRNA 125b-1	30
GALNT12	Polypeptide N-Acetylgalactosaminyltransferase 12	51
RAD54L	RAD54 Like	58
CDK2	Cyclin Dependent Kinase 2	64
BANCR	BRAF-Activated Non-Protein Coding RNA	21
MIR151A	MicroRNA 151a	28
FGFR4	Fibroblast Growth Factor Receptor 4	64
MIR106A	MicroRNA 106a	27
KLF6	KLF Transcription Factor 6	56
ICAM1	Intercellular Adhesion Molecule 1	63
PTGS2	Prostaglandin-Endoperoxide Synthase 2	62
RNASEL	Ribonuclease L	57
CYTOR	Cytoskeleton Regulator RNA	30
ENG	Endoglin	60
MIR212	MicroRNA 212	29
SOD2	Superoxide Dismutase 2	61
CYP1A1	Cytochrome P450 Family 1 Subfamily A Member 1	60
CREBBP	CREB Binding Protein	67
NR1H4	Nuclear Receptor Subfamily 1 Group H Member 4	60
GATA2	GATA Binding Protein 2	62
CXCL8	C-X-C Motif Chemokine Ligand 8	57
XRCC3	X-Ray Repair Cross Complementing 3	56
IGF1R	Insulin Like Growth Factor 1 Receptor	68
RASSF1	Ras Association Domain Family Member 1	57
KRT18	Keratin 18	62
CRNDE	Colorectal Neoplasia Differentially Expressed	29
MIR149	MicroRNA 149	31
SMAD2	SMAD Family Member 2	65
MMP9	Matrix Metallopeptidase 9	66
KMT2D	Lysine Methyltransferase 2D	57
KRT20	Keratin 20	53
IRF1	Interferon Regulatory Factor 1	60
PPM1D	Protein Phosphatase, Mg2+/Mn2+ Dependent 1D	61
GSTP1	Glutathione S-Transferase Pi 1	62
MIR100	MicroRNA 100	30
MMP2	Matrix Metallopeptidase 2	66
MIR133B	MicroRNA 133b	31
PRKN	Parkin RBR E3 Ubiquitin Protein Ligase	62
MIR132	MicroRNA 132	30
PBRM1	Polybromo 1	58
ERCC1	ERCC Excision Repair 1, Endonuclease Non-Catalytic Subunit	59
CD44	CD44 Molecule (IN Blood Group)	61
PPARA	Peroxisome Proliferator Activated Receptor Alpha	57
FANCG	FA Complementation Group G	57
MIR429	MicroRNA 429	30
GLI1	GLI Family Zinc Finger 1	60
CYP17A1	Cytochrome P450 Family 17 Subfamily A Member 1	62
MIR335	MicroRNA 335	28
APOB	Apolipoprotein B	59
CDC25A	Cell Division Cycle 25A	61
DRAIC	Downregulated RNA In Cancer, Inhibitor Of Cell Invasion And Migration	24
MIR216A	MicroRNA 216a	28
CBS	Cystathionine Beta-Synthase	64
MIR320A	MicroRNA 320a	31
PALLD	Palladin, Cytoskeletal Associated Protein	54
DANCR	Differentiation Antagonizing Non-Protein Coding RNA	32
MIR373	MicroRNA 373	29
SOX2-OT	SOX2 Overlapping Transcript	32
MIR324	MicroRNA 324	28
TYMP	Thymidine Phosphorylase	60
SNHG12	Small Nucleolar RNA Host Gene 12	32
MIR192	MicroRNA 192	30
SLC17A5	Solute Carrier Family 17 Member 5	58
HAGLR	HOXD Antisense Growth-Associated Long Non-Coding RNA	27
FANCE	FA Complementation Group E	54
LDLR	Low Density Lipoprotein Receptor	64
ABCB11	ATP Binding Cassette Subfamily B Member 11	60
MIR338	MicroRNA 338	27
WRAP53	WD Repeat Containing Antisense To TP53	52
NKX2-1	NK2 Homeobox 1	61
PCAT29	Prostate Cancer Associated Transcript 29	24
MIR185	MicroRNA 185	30
ERCC3	ERCC Excision Repair 3, TFIIH Core Complex Helicase Subunit	61
MIR424	MicroRNA 424	27
FOXA1	Forkhead Box A1	57
TH2-LCR	Th2 Cytokine Locus Control Region	10
MIR204	MicroRNA 204	31
MGMT	O-6-Methylguanine-DNA Methyltransferase	62
MIR494	MicroRNA 494	26
CDK6	Cyclin Dependent Kinase 6	64
JAG1	Jagged Canonical Notch Ligand 1	63
CASC15	Cancer Susceptibility 15	27
DPYD	Dihydropyrimidine Dehydrogenase	64
PDGFRB	Platelet Derived Growth Factor Receptor Beta	67
CASP3	Caspase 3	62
PHKA2	Phosphorylase Kinase Regulatory Subunit Alpha 2	56
ABCB4	ATP Binding Cassette Subfamily B Member 4	60
TGFBR1	Transforming Growth Factor Beta Receptor 1	67
FANCL	FA Complementation Group L	59
CDKN3	Cyclin Dependent Kinase Inhibitor 3	54
MIR128-2	MicroRNA 128-2	28
PRKDC	Protein Kinase, DNA-Activated, Catalytic Subunit	63
MIR24-2	MicroRNA 24-2	27
ADIPOQ	Adiponectin, C1Q And Collagen Domain Containing	59
XPA	XPA, DNA Damage Recognition And Repair Factor	58
PDCD1	Programmed Cell Death 1	60
BIRC5	Baculoviral IAP Repeat Containing 5	58
STAT1	Signal Transducer And Activator Of Transcription 1	65
DNMT1	DNA Methyltransferase 1	66
CDKN1C	Cyclin Dependent Kinase Inhibitor 1C	58
CYP1A2	Cytochrome P450 Family 1 Subfamily A Member 2	58
TP53COR1	Tumor Protein P53 Pathway Corepressor 1	15
MIRLET7A1	MicroRNA Let-7a-1	31
TCF7L2	Transcription Factor 7 Like 2	59
MIR181A2	MicroRNA 181a-2	28
ELAC2	ElaC Ribonuclease Z 2	54
SLC2A1	Solute Carrier Family 2 Member 1	66
MIR296	MicroRNA 296	25
SRA1	Steroid Receptor RNA Activator 1	49
HOXA11-AS	HOXA11 Antisense RNA	29
DDR2	Discoidin Domain Receptor Tyrosine Kinase 2	64
PYGL	Glycogen Phosphorylase L	59
RARB	Retinoic Acid Receptor Beta	62
MIR9-1	MicroRNA 9-1	30
HADHA	Hydroxyacyl-CoA Dehydrogenase Trifunctional Multienzyme Complex Subunit Alpha	59
CAV1	Caveolin 1	61
ARG1	Arginase 1	62
LEP	Leptin	59
LOC126806659	BRD4-Independent Group 4 Enhancer GRCh37_chr3:41274918-41276117	10
CPT1A	Carnitine Palmitoyltransferase 1A	61
TERC	Telomerase RNA Component	36
SNHG16	Small Nucleolar RNA Host Gene 16	27
MIR378A	MicroRNA 378a	31
RECQL	RecQ Like Helicase	54
MAP3K1	Mitogen-Activated Protein Kinase Kinase Kinase 1	63
NR1H2	Nuclear Receptor Subfamily 1 Group H Member 2	59
MIR33A	MicroRNA 33a	28
ABCA1	ATP Binding Cassette Subfamily A Member 1	62
MIR98	MicroRNA 98	27
PTENP1	Phosphatase And Tensin Homolog Pseudogene 1	27
SHC1	SHC Adaptor Protein 1	57
LOC126806658	BRD4-Independent Group 4 Enhancer GRCh37_chr3:41265899-41267098	10
ALDH2	Aldehyde Dehydrogenase 2 Family Member	64
FANCF	FA Complementation Group F	53
NAT2	N-Acetyltransferase 2	57
TLR4	Toll Like Receptor 4	64
CYP19A1	Cytochrome P450 Family 19 Subfamily A Member 1	61
ABCG2	ATP Binding Cassette Subfamily G Member 2 (JR Blood Group)	62
ERCC6	ERCC Excision Repair 6, Chromatin Remodeling Factor	60
CASC11	Cancer Susceptibility 11	25
F2	Coagulation Factor II, Thrombin	63
CBL	Cbl Proto-Oncogene	64
ABRAXAS1	Abraxas 1, BRCA1 A Complex Subunit	50
IGFBP3	Insulin Like Growth Factor Binding Protein 3	59
MIR181C	MicroRNA 181c	28
NPM1	Nucleophosmin 1	63
PANDAR	Promoter Of CDKN1A Antisense DNA Damage Activated RNA	19
XRCC1	X-Ray Repair Cross Complementing 1	58
MKI67	Marker Of Proliferation Ki-67	57
BMP6	Bone Morphogenetic Protein 6	57
MIR193A	MicroRNA 193a	28
CEACAM5	CEA Cell Adhesion Molecule 5	56
ATRX	ATRX Chromatin Remodeler	60
RHBDF2	Rhomboid 5 Homolog 2	52
MIR22HG	MIR22 Host Gene	34
SETD2	SET Domain Containing 2, Histone Lysine Methyltransferase	60
FBN1	Fibrillin 1	60
CBR3-AS1	CBR3 Antisense RNA 1	27
FLT4	Fms Related Receptor Tyrosine Kinase 4	65
MAPK8	Mitogen-Activated Protein Kinase 8	62
LRP1B	LDL Receptor Related Protein 1B	53
DNMT3A	DNA Methyltransferase 3 Alpha	65
ABCC4	ATP Binding Cassette Subfamily C Member 4 (PEL Blood Group)	58
PARP1	Poly(ADP-Ribose) Polymerase 1	64
MIR483	MicroRNA 483	30
TLR2	Toll Like Receptor 2	65
BCYRN1	Brain Cytoplasmic RNA 1	28
PGR	Progesterone Receptor	62
MIR10A	MicroRNA 10a	30
CASC8	Cancer Susceptibility 8	24
LOC129390903	MPRA-Validated Peak2919 Silencer	9
XBP1	X-Box Binding Protein 1	59
ABL1	ABL Proto-Oncogene 1, Non-Receptor Tyrosine Kinase	65
NORAD	Non-Coding RNA Activated By DNA Damage	27
MIR497	MicroRNA 497	27
MIAT	Myocardial Infarction Associated Transcript	34
PCA3	Prostate Cancer Associated 3	31
SOX9	SRY-Box Transcription Factor 9	58
APOE	Apolipoprotein E	62
KRT8	Keratin 8	60
GGT1	Gamma-Glutamyltransferase 1	62
KEAP1	Kelch Like ECH Associated Protein 1	61
DLEC1	DLEC1 Cilia And Flagella Associated Protein	49
GLUL	Glutamate-Ammonia Ligase	61
POLG	DNA Polymerase Gamma, Catalytic Subunit	61
ZEB1	Zinc Finger E-Box Binding Homeobox 1	62
JAK1	Janus Kinase 1	66
CYP2D6	Cytochrome P450 Family 2 Subfamily D Member 6 (Gene/Pseudogene)	60
CRP	C-Reactive Protein	58
MIR101-1	MicroRNA 101-1	28
FHIT	Fragile Histidine Triad Diadenosine Triphosphatase	55
HLA-DRB1	Major Histocompatibility Complex, Class II, DR Beta 1	60
BCAR4	Breast Cancer Anti-Estrogen Resistance 4	27
SOX2	SRY-Box Transcription Factor 2	58
PKD1-AS1	PKD1 Antisense RNA 1	21
PCNA	Proliferating Cell Nuclear Antigen	63
MIR15B	MicroRNA 15b	28
CCL2	C-C Motif Chemokine Ligand 2	62
SLC25A13	Solute Carrier Family 25 Member 13	58
MIR374A	MicroRNA 374a	25
CD82	CD82 Molecule	57
PHKG2	Phosphorylase Kinase Catalytic Subunit Gamma 2	58
CP	Ceruloplasmin	62
HSP90AA1	Heat Shock Protein 90 Alpha Family Class A Member 1	64
FASN	Fatty Acid Synthase	61
MIRLET7A3	MicroRNA Let-7a-3	28
CASR	Calcium Sensing Receptor	64
SNHG15	Small Nucleolar RNA Host Gene 15	30
HMMR	Hyaluronan Mediated Motility Receptor	57
AMACR	Alpha-Methylacyl-CoA Racemase	58
RIOX2	Ribosomal Oxygenase 2	48
MIR301A	MicroRNA 301a	27
SERPINE1	Serpin Family E Member 1	63
GSK3B	Glycogen Synthase Kinase 3 Beta	64
MIR32	MicroRNA 32	31
MCL1	MCL1 Apoptosis Regulator, BCL2 Family Member	62
MIR211	MicroRNA 211	30
NFKBIA	NFKB Inhibitor Alpha	64
NNT-AS1	NNT Antisense RNA 1	24
BUB1	BUB1 Mitotic Checkpoint Serine/Threonine Kinase	61
GSTT1	Glutathione S-Transferase Theta 1	44
AKT3	AKT Serine/Threonine Kinase 3	68
PTPN3	Protein Tyrosine Phosphatase Non-Receptor Type 3	55
LNCRNA-ATB	LncRNA Activated By TGF-Beta	12
ADAR	Adenosine Deaminase RNA Specific	60
LRP6	LDL Receptor Related Protein 6	60
MMP1	Matrix Metallopeptidase 1	62
TFDP1	Transcription Factor Dp-1	55
G6PC1	Glucose-6-Phosphatase Catalytic Subunit 1	56
NPTN-IT1	NPTN Intronic Transcript 1	19
MIR196A2	MicroRNA 196a-2	30
MIR328	MicroRNA 328	29
HOXA-AS2	HOXA Cluster Antisense RNA 2	27
IRS1	Insulin Receptor Substrate 1	61
SLCO1B1	Solute Carrier Organic Anion Transporter Family Member 1B1	59
MIR148B	MicroRNA 148b	30
MIR24-1	MicroRNA 24-1	27
CTAG1B	Cancer/Testis Antigen 1B	41
RELA	RELA Proto-Oncogene, NF-KB Subunit	64
CXCL12	C-X-C Motif Chemokine Ligand 12	59
RHOA	Ras Homolog Family Member A	62
PDGFRL	Platelet Derived Growth Factor Receptor Like	53
TCF7	Transcription Factor 7	54
WWOX	WW Domain Containing Oxidoreductase	60
DGCR5	DiGeorge Syndrome Critical Region Gene 5	28
TNFSF10	TNF Superfamily Member 10	58
BCL2L1	BCL2 Like 1	62
FALEC	Focally Amplified LncRNA Regulator Of ECM1	24
SP1	Sp1 Transcription Factor	60
LUCAT1	Lung Cancer Associated Transcript 1	25
XIAP	X-Linked Inhibitor Of Apoptosis	64
APOA1	Apolipoprotein A1	63
MECOM	MDS1 And EVI1 Complex Locus	61
MIR95	MicroRNA 95	27
SLX4	SLX4 Structure-Specific Endonuclease Subunit	50
FN1	Fibronectin 1	63
PLAU	Plasminogen Activator, Urokinase	64
LARS1	Leucyl-TRNA Synthetase 1	57
FAH	Fumarylacetoacetate Hydrolase	59
ALDOB	Aldolase, Fructose-Bisphosphate B	59
EPHB2	EPH Receptor B2	65
MIR30D	MicroRNA 30d	26
MIR361	MicroRNA 361	27
SNHG7	Small Nucleolar RNA Host Gene 7	30
DDB2	Damage Specific DNA Binding Protein 2	59
TNFRSF1A	TNF Receptor Superfamily Member 1A	62
SNHG6	Small Nucleolar RNA Host Gene 6	26
MIR345	MicroRNA 345	28
MIR136	MicroRNA 136	30
CASP10	Caspase 10	60
PRF1	Perforin 1	60
CALR	Calreticulin	64
MIR193B	MicroRNA 193b	29
OTC	Ornithine Transcarbamylase	60
SNHG20	Small Nucleolar RNA Host Gene 20	29
FGF2	Fibroblast Growth Factor 2	59
RXRA	Retinoid X Receptor Alpha	61
MIR29B2	MicroRNA 29b-2	26
SLC67A1	Solute Carrier Family 67 Member 1	53
SLC11A2	Solute Carrier Family 11 Member 2	61
NOS2	Nitric Oxide Synthase 2	62
ABCC3	ATP Binding Cassette Subfamily C Member 3	58
PRNCR1	Prostate Cancer Associated Non-Coding RNA 1	21
FOXP3	Forkhead Box P3	59
KLK3	Kallikrein Related Peptidase 3	60
VEGFC	Vascular Endothelial Growth Factor C	60
LOC111589215	BRCA1 Promoter Region	10
WT1-AS	WT1 Antisense RNA	36
BCAR1	BCAR1 Scaffold Protein, Cas Family Member	56
IL7R	Interleukin 7 Receptor	59
IL2RA	Interleukin 2 Receptor Subunit Alpha	63
PTK2	Protein Tyrosine Kinase 2	61
LDHA	Lactate Dehydrogenase A	64
NQO1	NAD(P)H Quinone Dehydrogenase 1	61
HMOX1	Heme Oxygenase 1	65
MYCN	MYCN Proto-Oncogene, BHLH Transcription Factor	59
MAP2K4	Mitogen-Activated Protein Kinase Kinase 4	62
CYCS	Cytochrome C, Somatic	61
NR1H3	Nuclear Receptor Subfamily 1 Group H Member 3	59
IL4	Interleukin 4	59
CDK1	Cyclin Dependent Kinase 1	60
THADA	THADA Armadillo Repeat Containing	49
PFKL	Phosphofructokinase, Liver Type	58
DCC	DCC Netrin 1 Receptor	60
GHET1	Gastric Carcinoma Proliferation Enhancing Transcript 1	20
PKM	Pyruvate Kinase M1/2	62
MIRLET7I	MicroRNA Let-7i	30
POLR1HASP	POLR1H Antisense, Pseudogene	27
FOS	Fos Proto-Oncogene, AP-1 Transcription Factor Subunit	64
MIR331	MicroRNA 331	28
LOC110806263	TERT 5' Regulatory Region	10
EPHB4	EPH Receptor B4	66
MIR125B2	MicroRNA 125b-2	29
IGF2-AS	IGF2 Antisense RNA	35
CERNA3	Competing Endogenous LncRNA 3 For MiR-645	21
NME1	NME/NM23 Nucleoside Diphosphate Kinase 1	60
DNMT3B	DNA Methyltransferase 3 Beta	64
PPP2R1B	Protein Phosphatase 2 Scaffold Subunit Abeta	60
MIR30C1	MicroRNA 30c-1	30
TIMP1	TIMP Metallopeptidase Inhibitor 1	57
NCOR1	Nuclear Receptor Corepressor 1	57
SLC2A2	Solute Carrier Family 2 Member 2	63
BIRC3	Baculoviral IAP Repeat Containing 3	60
TGFA	Transforming Growth Factor Alpha	58
MIR137	MicroRNA 137	27
MIR30B	MicroRNA 30b	30
RARA	Retinoic Acid Receptor Alpha	62
PCSK9	Proprotein Convertase Subtilisin/Kexin Type 9	62
PIK3CD	Phosphatidylinositol-4,5-Bisphosphate 3-Kinase Catalytic Subunit Delta	65
MIR197	MicroRNA 197	28
MIR342	MicroRNA 342	30
SPP1	Secreted Phosphoprotein 1	57
HLA-B	Major Histocompatibility Complex, Class I, B	59
MIR34B	MicroRNA 34b	30
E2F1	E2F Transcription Factor 1	57
PROM1	Prominin 1	60
FLT3	Fms Related Receptor Tyrosine Kinase 3	66
MIR186	MicroRNA 186	28
MAPK3	Mitogen-Activated Protein Kinase 3	62
PC	Pyruvate Carboxylase	60
MIR219A1	MicroRNA 219a-1	30
POLK	DNA Polymerase Kappa	55
MMUT	Methylmalonyl-CoA Mutase	58
SHH	Sonic Hedgehog Signaling Molecule	63
KDM6A	Lysine Demethylase 6A	60
FOXO3	Forkhead Box O3	60
IFNA1	Interferon Alpha 1	51
CASP9	Caspase 9	61
IL1A	Interleukin 1 Alpha	58
AHR	Aryl Hydrocarbon Receptor	61
TP73	Tumor Protein P73	58
LOC100507346	Uncharacterized LOC100507346	16
SOS1	SOS Ras/Rac Guanine Nucleotide Exchange Factor 1	64
KLLN	Killin, P53 Regulated DNA Replication Inhibitor	42
CTSD	Cathepsin D	65
TF	Transferrin	64
HDAC1	Histone Deacetylase 1	63
OGG1	8-Oxoguanine DNA Glycosylase	60
MIR375	MicroRNA 375	30
MIRLET7F1	MicroRNA Let-7f-1	27
TNFRSF10B	TNF Receptor Superfamily Member 10b	62
ODC1	Ornithine Decarboxylase 1	61
LIG4	DNA Ligase 4	60
PCAT6	Prostate Cancer Associated Transcript 6	25
SOCS1	Suppressor Of Cytokine Signaling 1	58
SIRT1	Sirtuin 1	62
STAT5B	Signal Transducer And Activator Of Transcription 5B	62
SREBF1	Sterol Regulatory Element Binding Transcription Factor 1	61
SNAI1	Snail Family Transcriptional Repressor 1	57
PHB1	Prohibitin 1	58
CD36	CD36 Molecule (CD36 Blood Group)	63
LINC00261	Long Intergenic Non-Protein Coding RNA 261	27
MXI1	MAX Interactor 1, Dimerization Protein	54
ACTA2	Actin Alpha 2, Smooth Muscle	61
MIR124-1	MicroRNA 124-1	28
SEPTIN9	Septin 9	52
IL12RB1	Interleukin 12 Receptor Subunit Beta 1	58
CYP1B1	Cytochrome P450 Family 1 Subfamily B Member 1	61
MIR370	MicroRNA 370	30
VIM	Vimentin	64
FABP1	Fatty Acid Binding Protein 1	55
GFER	Growth Factor, Augmenter Of Liver Regeneration	58
MIR130B	MicroRNA 130b	28
ESR2	Estrogen Receptor 2	61
CERNA2	Competing Endogenous LncRNA 2 For MicroRNA Let-7b	20
MAPK14	Mitogen-Activated Protein Kinase 14	64
TWIST1	Twist Family BHLH Transcription Factor 1	60
SLC19A1	Solute Carrier Family 19 Member 1	60
CALCA	Calcitonin Related Polypeptide Alpha	57
LOC107303340	3p25 Von Hippel-Lindau Tumor Suppressor, E3 Ubiquitin Protein Ligase Alu-Mediated Recombination Region	10
LEPR	Leptin Receptor	62
SOCS3	Suppressor Of Cytokine Signaling 3	57
CEBPB	CCAAT Enhancer Binding Protein Beta	58
ZEB1-AS1	ZEB1 Antisense RNA 1	25
BIVM-ERCC5	BIVM-ERCC5 Readthrough	26
SLCO1B3	Solute Carrier Organic Anion Transporter Family Member 1B3	57
PRKCA	Protein Kinase C Alpha	64
TGFB2	Transforming Growth Factor Beta 2	64
EXT2	Exostosin Glycosyltransferase 2	58
B2M	Beta-2-Microglobulin	62
RPS20	Ribosomal Protein S20	55
MAP2K2	Mitogen-Activated Protein Kinase Kinase 2	67
RECK	Reversion Inducing Cysteine Rich Protein With Kazal Motifs	52
DKK3	Dickkopf WNT Signaling Pathway Inhibitor 3	52
IL6R	Interleukin 6 Receptor	63
ZEB2	Zinc Finger E-Box Binding Homeobox 2	61
ALDOA	Aldolase, Fructose-Bisphosphate A	62
TP63	Tumor Protein P63	58
EPAS1	Endothelial PAS Domain Protein 1	64
ATP8B1	ATPase Phospholipid Transporting 8B1	54
SPINK1	Serine Peptidase Inhibitor Kazal Type 1	54
TSG101	Tumor Susceptibility 101	57
HLA-A	Major Histocompatibility Complex, Class I, A	59
MMP7	Matrix Metallopeptidase 7	60
TOP2A	DNA Topoisomerase II Alpha	63
NR1I2	Nuclear Receptor Subfamily 1 Group I Member 2	55
IRS2	Insulin Receptor Substrate 2	59
DCTN5	Dynactin Subunit 5	52
CD40LG	CD40 Ligand	62
MIR339	MicroRNA 339	30
HAMP	Hepcidin Antimicrobial Peptide	56
PDGFB	Platelet Derived Growth Factor Subunit B	64
LIPA	Lipase A, Lysosomal Acid Type	62
CSF1R	Colony Stimulating Factor 1 Receptor	65
MIR202	MicroRNA 202	27
TMPRSS2	Transmembrane Serine Protease 2	60
ALPP	Alkaline Phosphatase, Placental	57
NR3C1	Nuclear Receptor Subfamily 3 Group C Member 1	62
NSD1	Nuclear Receptor Binding SET Domain Protein 1	57
SRD5A2	Steroid 5 Alpha-Reductase 2	55
FBP1	Fructose-Bisphosphatase 1	62
POU5F1	POU Class 5 Homeobox 1	60
PRKACA	Protein Kinase CAMP-Activated Catalytic Subunit Alpha	65
BCL10	BCL10 Immune Signaling Adaptor	58
KMT2A	Lysine Methyltransferase 2A	60
NCOA3	Nuclear Receptor Coactivator 3	60
MTR	5-Methyltetrahydrofolate-Homocysteine Methyltransferase	61
GUSB	Glucuronidase Beta	62
CKS1B	CDC28 Protein Kinase Regulatory Subunit 1B	54
MIR92A1	MicroRNA 92a-1	28
ITCH	Itchy E3 Ubiquitin Protein Ligase	60
TCF4	Transcription Factor 4	60
CYP2C19	Cytochrome P450 Family 2 Subfamily C Member 19	58
HLA-DQB1	Major Histocompatibility Complex, Class II, DQ Beta 1	57
MUC6	Mucin 6, Oligomeric Mucus/Gel-Forming (Gene/Pseudogene)	52
PKLR	Pyruvate Kinase L/R	60
PRKCD	Protein Kinase C Delta	65
PAX8	Paired Box 8	58
ETV6	ETS Variant Transcription Factor 6	59
CCND3	Cyclin D3	58
ZFHX3	Zinc Finger Homeobox 3	55
TSHR	Thyroid Stimulating Hormone Receptor	61
CLDN1	Claudin 1	59
JAK3	Janus Kinase 3	65
HSPA5	Heat Shock Protein Family A (Hsp70) Member 5	61
CCND2	Cyclin D2	61
CSF3	Colony Stimulating Factor 3	55
EPHX1	Epoxide Hydrolase 1	57
CLPTM1L	CLPTM1 Like	50
RNY3	RNA, Ro60-Associated Y3	24
MMP14	Matrix Metallopeptidase 14	64
TUSC7	Tumor Suppressor Candidate 7	24
WEE1	WEE1 G2 Checkpoint Kinase	61
MIR423	MicroRNA 423	27
ACTB	Actin Beta	63
MIR503	MicroRNA 503	28
RB1CC1	RB1 Inducible Coiled-Coil 1	56
NOS3	Nitric Oxide Synthase 3	62
NOTCH3	Notch Receptor 3	64
HMGCR	3-Hydroxy-3-Methylglutaryl-CoA Reductase	61
CREB1	CAMP Responsive Element Binding Protein 1	62
GAPDH	Glyceraldehyde-3-Phosphate Dehydrogenase	64
MIR31HG	MIR31 Host Gene	27
ZEB2-AS1	ZEB2 Antisense RNA 1	27
CAMTA1	Calmodulin Binding Transcription Activator 1	52
LOC130062899	ATAC-STARR-Seq Lymphoblastoid Active Region 13597	9
SOD1	Superoxide Dismutase 1	66
MIR100HG	Mir-100-Let-7a-2-Mir-125b-1 Cluster Host Gene	26
URB2	URB2 Ribosome Biogenesis Homolog	45
TOE1	Target Of EGR1, Exonuclease	50
FER1L4	Fer-1 Like Family Member 4 (Pseudogene)	30
CDH17	Cadherin 17	56
TGFBR3	Transforming Growth Factor Beta Receptor 3	60
ASS1	Argininosuccinate Synthase 1	62
SCHLAP1	SWI/SNF Complex Antagonist Associated With Prostate Cancer 1	24
MAPK10	Mitogen-Activated Protein Kinase 10	60
PAH	Phenylalanine Hydroxylase	60
SST	Somatostatin	54
BMP7	Bone Morphogenetic Protein 7	60
MIR377	MicroRNA 377	27
GCK	Glucokinase	62
TP53BP1	Tumor Protein P53 Binding Protein 1	56
TET2	Tet Methylcytosine Dioxygenase 2	58
F3	Coagulation Factor III, Tissue Factor	58
RUVBL1	RuvB Like AAA ATPase 1	57
MED1	Mediator Complex Subunit 1	55
MT-CO1	Mitochondrially Encoded Cytochrome C Oxidase I	47
LINC00511	Long Intergenic Non-Protein Coding RNA 511	27
EPO	Erythropoietin	55
MUC2	Mucin 2, Oligomeric Mucus/Gel-Forming	52
TTR	Transthyretin	61
BMP4	Bone Morphogenetic Protein 4	62
FADD	Fas Associated Via Death Domain	60
LGALS3	Galectin 3	57
SKP2	S-Phase Kinase Associated Protein 2	58
MIR485	MicroRNA 485	27
PIK3CB	Phosphatidylinositol-4,5-Bisphosphate 3-Kinase Catalytic Subunit Beta	61
LAMA5	Laminin Subunit Alpha 5	56
KIF12	Kinesin Family Member 12	47
CD46	CD46 Molecule	61
IL18	Interleukin 18	57
PPARD	Peroxisome Proliferator Activated Receptor Delta	59
HMGB1	High Mobility Group Box 1	62
KITLG	KIT Ligand	60
PFKFB1	6-Phosphofructo-2-Kinase/Fructose-2,6-Biphosphatase 1	54
MIR425	MicroRNA 425	29
HSPB1	Heat Shock Protein Family B (Small) Member 1	65
LOC130001603	ATAC-STARR-Seq Lymphoblastoid Silent Region 19811	10
G6PD	Glucose-6-Phosphate Dehydrogenase	62
MIRLET7A2	MicroRNA Let-7a-2	25
GFOD3P	Gfo/Idh/MocA-Like Oxidoreductase Domain Containing 3, Pseudogene	26
PPP2R2A	Protein Phosphatase 2 Regulatory Subunit Balpha	58
BSCL2	BSCL2 Lipid Droplet Biogenesis Associated, Seipin	55
SNAI2	Snail Family Transcriptional Repressor 2	55
BMP2	Bone Morphogenetic Protein 2	58
MYB	MYB Proto-Oncogene, Transcription Factor	62
NKILA	NF-KappaB Interacting LncRNA	21
CCN2	Cellular Communication Network Factor 2	58
STAT5A	Signal Transducer And Activator Of Transcription 5A	62
HSPA4	Heat Shock Protein Family A (Hsp70) Member 4	55
CPS1	Carbamoyl-Phosphate Synthase 1	61
KMT2C	Lysine Methyltransferase 2C	56
MIR103A2	MicroRNA 103a-2	27
FOCAD	Focadhesin	46
TIMP2	TIMP Metallopeptidase Inhibitor 2	54
PPP2R1A	Protein Phosphatase 2 Scaffold Subunit Aalpha	60
MIR154	MicroRNA 154	28
PCBP2-OT1	PCBP2 Overlapping Transcript 1	15
IL17A	Interleukin 17A	55
CYP7A1	Cytochrome P450 Family 7 Subfamily A Member 1	54
SOD2-OT1	SOD2 Overlapping Transcript 1	20
MIR206	MicroRNA 206	28
GNA11	G Protein Subunit Alpha 11	60
SQSTM1	Sequestosome 1	62
AGT	Angiotensinogen	62
PLK1	Polo Like Kinase 1	64
UGT1A9	UDP Glucuronosyltransferase Family 1 Member A9	58
CD34	CD34 Molecule	58
CCEPR	Cervical Carcinoma Expressed PCNA Regulatory LncRNA	19
THBS1	Thrombospondin 1	59
PTPRC	Protein Tyrosine Phosphatase Receptor Type C	65
ACE	Angiotensin I Converting Enzyme	64
STARD13	StAR Related Lipid Transfer Domain Containing 13	50
MCC	MCC Regulator Of WNT Signaling Pathway	54
HSD17B4	Hydroxysteroid 17-Beta Dehydrogenase 4	60
CASC19	Cancer Susceptibility 19	24
BID	BH3 Interacting Domain Death Agonist	58
LRRC56	Leucine Rich Repeat Containing 56	47
MIR542	MicroRNA 542	26
MED12	Mediator Complex Subunit 12	57
GNAQ	G Protein Subunit Alpha Q	61
ADA	Adenosine Deaminase	64
BCL6	BCL6 Transcription Repressor	59
KIF1B	Kinesin Family Member 1B	55
GJA1	Gap Junction Protein Alpha 1	64
MIR128-1	MicroRNA 128-1	27
ATG7	Autophagy Related 7	55
MIR500A	MicroRNA 500a	25
IL21R-AS1	IL21R Antisense RNA 1	18
PAK4	P21 (RAC1) Activated Kinase 4	61
EXT1	Exostosin Glycosyltransferase 1	60
GNE	Glucosamine (UDP-N-Acetyl)-2-Epimerase/N-Acetylmannosamine Kinase	55
BTK	Bruton Tyrosine Kinase	67
GPI	Glucose-6-Phosphate Isomerase	60
PHKB	Phosphorylase Kinase Regulatory Subunit Beta	55
CYLD	CYLD Lysine 63 Deubiquitinase	61
GDF15	Growth Differentiation Factor 15	56
AREG	Amphiregulin	55
SLC37A4	Solute Carrier Family 37 Member 4	54
TOP1	DNA Topoisomerase I	62
LIVAR	Liver Cell Viability Associated LncRNA	16
CHD1	Chromodomain Helicase DNA Binding Protein 1	57
BCR	BCR Activator Of RhoGEF And GTPase	65
MIR376A1	MicroRNA 376a-1	24
TCF3	Transcription Factor 3	59
E2F4	E2F Transcription Factor 4	57
SMPD1	Sphingomyelin Phosphodiesterase 1	61
MAD1L1	Mitotic Arrest Deficient 1 Like 1	59
CDKN2C	Cyclin Dependent Kinase Inhibitor 2C	57
PTK2B	Protein Tyrosine Kinase 2 Beta	62
NR5A2	Nuclear Receptor Subfamily 5 Group A Member 2	57
MIR196B	MicroRNA 196b	30
PLAUR	Plasminogen Activator, Urokinase Receptor	57
MIR532	MicroRNA 532	25
BAK1	BCL2 Antagonist/Killer 1	57
CCNA2	Cyclin A2	58
LPL	Lipoprotein Lipase	63
TRIM24	Tripartite Motif Containing 24	57
CAT	Catalase	64
FENDRR	FOXF1 Adjacent Non-Coding Developmental Regulatory RNA	28
MIR675	MicroRNA 675	28
CYP2B6	Cytochrome P450 Family 2 Subfamily B Member 6	59
RPS6KB1	Ribosomal Protein S6 Kinase B1	63
RIPK1	Receptor Interacting Serine/Threonine Kinase 1	64
IGFBP1	Insulin Like Growth Factor Binding Protein 1	55
ETS1	ETS Proto-Oncogene 1, Transcription Factor	61
ADH1B	Alcohol Dehydrogenase 1B (Class I), Beta Polypeptide	57
SPEN	Spen Family Transcriptional Repressor	52
CPS1-IT1	CPS1 Intronic Transcript 1	25
MPV17	Mitochondrial Inner Membrane Protein MPV17	53
AURKB	Aurora Kinase B	65
RAC1	Rac Family Small GTPase 1	62
ALDH1A1	Aldehyde Dehydrogenase 1 Family Member A1	60
TRRAP	Transformation/Transcription Domain Associated Protein	57
AGL	Amylo-Alpha-1,6-Glucosidase And 4-Alpha-Glucanotransferase	58
HSD17B13	Hydroxysteroid 17-Beta Dehydrogenase 13	50
APEX1	Apurinic/Apyrimidinic Endodeoxyribonuclease 1	58
LYN	LYN Proto-Oncogene, Src Family Tyrosine Kinase	62
MIRLET7F2	MicroRNA Let-7f-2	24
CCNB1	Cyclin B1	60
CSF1	Colony Stimulating Factor 1	57
MIR486-1	MicroRNA 486-1	28
ERG	ETS Transcription Factor ERG	59
HOXA13	Homeobox A13	52
EPHA2	EPH Receptor A2	65
MIR491	MicroRNA 491	29
ACVR1B	Activin A Receptor Type 1B	60
TNFRSF8	TNF Receptor Superfamily Member 8	56
DDIT3	DNA Damage Inducible Transcript 3	59
NEK2	NIMA Related Kinase 2	63
IKBKB	Inhibitor Of Nuclear Factor Kappa B Kinase Subunit Beta	67
KDM3A	Lysine Demethylase 3A	54
RUNX3	RUNX Family Transcription Factor 3	55
ALPL	Alkaline Phosphatase, Biomineralization Associated	63
PCAT2	Prostate Cancer Associated Transcript 2	24
MIR187	MicroRNA 187	27
SNHG3	Small Nucleolar RNA Host Gene 3	30
KDM4B	Lysine Demethylase 4B	58
NPC1	NPC Intracellular Cholesterol Transporter 1	62
MME	Membrane Metalloendopeptidase	62
MIR511	MicroRNA 511	25
COMT	Catechol-O-Methyltransferase	64
MIR499A	MicroRNA 499a	30
CCL5	C-C Motif Chemokine Ligand 5	56
CASC9	Cancer Susceptibility 9	22
ELAVL1	ELAV Like RNA Binding Protein 1	54
MIR135B	MicroRNA 135b	30
DROSHA	Drosha Ribonuclease III	57
MBD4	Methyl-CpG Binding Domain 4, DNA Glycosylase	56
XDH	Xanthine Dehydrogenase	60
LINC01138	Long Intergenic Non-Protein Coding RNA 1138	23
PPARGC1A	PPARG Coactivator 1 Alpha	60
PCAT7	Prostate Cancer Associated Transcript 7	22
CD40	CD40 Molecule	63
CEACAM3	CEA Cell Adhesion Molecule 3	55
MPO	Myeloperoxidase	65
MPL	MPL Proto-Oncogene, Thrombopoietin Receptor	60
GBE1	1,4-Alpha-Glucan Branching Enzyme 1	57
LOC126860438	MED14-Independent Group 3 Enhancer GRCh37_chr8:90959982-90961181	9
FOXA2	Forkhead Box A2	60
RNY1	RNA, Ro60-Associated Y1	24
LOC107303338	3p25 FANCD2 Alu-Mediated Recombination Region	11
ACTC1	Actin Alpha Cardiac Muscle 1	58
SLC5A5	Solute Carrier Family 5 Member 5	57
PRSS1	Serine Protease 1	58
HOXA9	Homeobox A9
PABPC4	Poly(A) Binding Protein Cytoplasmic 4
STOML2	Stomatin Like 2
TMEM33	Transmembrane Protein 33
MIR3187	MicroRNA 3187
NME2	NME/NM23 Nucleoside Diphosphate Kinase 2
TRPC5	Transient Receptor Potential Cation Channel Subfamily C Member 5
PWAR1	Prader Willi/Angelman Region RNA 1
NRAD1	Non-Coding RNA In The Aldehyde Dehydrogenase 1A Pathway
SMAD3	SMAD Family Member 3
CDK2	Cyclin Dependent Kinase 2
PRKDC	Protein Kinase, DNA-Activated, Catalytic Subunit
PI4KA	Phosphatidylinositol 4-Kinase Alpha
PRKCE	Protein Kinase C Epsilon
ARAF	A-Raf Proto-Oncogene, Serine/Threonine Kinase
RIGI	RNA Sensor RIG-I
CEBPA	CCAAT Enhancer Binding Protein Alpha
EZR	Ezrin
HNRNPK	Heterogeneous Nuclear Ribonucleoprotein K
LBR	Lamin B Receptor
SIGMAR1	Sigma Non-Opioid Intracellular Receptor 1
UBE2N	Ubiquitin Conjugating Enzyme E2 N
CHD4	Chromodomain Helicase DNA Binding Protein 4
PSMD14	Proteasome 26S Subunit, Non-ATPase 14
SKP1	S-Phase Kinase Associated Protein 1
ARCN1	Archain 1
FABP5	Fatty Acid Binding Protein 5
HNRNPC	Heterogeneous Nuclear Ribonucleoprotein C
PSMA4	Proteasome 20S Subunit Alpha 4
PTTG1	PTTG1 Regulator Of Sister Chromatid Separation, Securin
H2AZ1	H2A.Z Variant Histone 1
TCP1	T-Complex 1
TOP1MT	DNA Topoisomerase I Mitochondrial
H2BC3	H2B Clustered Histone 3
CORO1C	Coronin 1C
H4C1	H4 Clustered Histone 1
LHX9	LIM Homeobox 9
OTUB2	OTU Deubiquitinase, Ubiquitin Aldehyde Binding 2
SCAMP3	Secretory Carrier Membrane Protein 3
MIR200B	MicroRNA 200b
MIR451A	MicroRNA 451a
MIR20B	MicroRNA 20b
PCAT19	Prostate Cancer Associated Transcript 19
PARK7	Parkinsonism Associated Deglycase
TGFBI	Transforming Growth Factor Beta Induced
PER1	Period Circadian Regulator 1
MIR330	MicroRNA 330
MIR9-1	MicroRNA 9-1
MIR144	MicroRNA 144
EEF1A1P5	Eukaryotic Translation Elongation Factor 1 Alpha 1 Pseudogene 5
GFAP	Glial Fibrillary Acidic Protein
RNU6-1	RNA, U6 Small Nuclear 1
SHH	Sonic Hedgehog Signaling Molecule
CDC42	Cell Division Cycle 42
ARG1	Arginase 1
RAB7A	RAB7A, Member RAS Oncogene Family
NFATC1	Nuclear Factor Of Activated T Cells 1
RPL11	Ribosomal Protein L11
HLA-A	Major Histocompatibility Complex, Class I, A
ABHD5	Abhydrolase Domain Containing 5, Lysophosphatidic Acid Acyltransferase
TRPM7	Transient Receptor Potential Cation Channel Subfamily M Member 7
RDH11	Retinol Dehydrogenase 11
GPX2	Glutathione Peroxidase 2
SENP1	SUMO Specific Peptidase 1
FOXJ1	Forkhead Box J1
U2AF2	U2 Small Nuclear RNA Auxiliary Factor 2
ATP5PB	ATP Synthase Peripheral Stalk-Membrane Subunit B
MTREX	Mtr4 Exosome RNA Helicase
TRIM31	Tripartite Motif Containing 31
TOMM22	Translocase Of Outer Mitochondrial Membrane 22
MISP	Mitotic Spindle Positioning
MIR26B	MicroRNA 26b
MIR28	MicroRNA 28
MIR542	MicroRNA 542
YWHAG	Tyrosine 3-Monooxygenase/Tryptophan 5-Monooxygenase Activation Protein Gamma
AGER	Advanced Glycosylation End-Product Specific Receptor
AKR1C3	Aldo-Keto Reductase Family 1 Member C3
EMD	Emerin
FOXA1	Forkhead Box A1
COPS5	COP9 Signalosome Subunit 5
ELAVL1	ELAV Like RNA Binding Protein 1
TSLP	Thymic Stromal Lymphopoietin
TUBB6	Tubulin Beta 6 Class V
RALBP1	RalA Binding Protein 1
RPL9	Ribosomal Protein L9
STK25	Serine/Threonine Kinase 25
BRAT1	BRCA1 Associated ATM Activator 1
UCHL3	Ubiquitin C-Terminal Hydrolase L3
MIR148B	MicroRNA 148b
LINC00243	Long Intergenic Non-Protein Coding RNA 243
FILNC1	FOXO Induced Long Non-Coding RNA 1
ACAT2	Acetyl-CoA Acetyltransferase 2
MECP2	Methyl-CpG Binding Protein 2
NDUFS7	NADH:Ubiquinone Oxidoreductase Core Subunit S7
NDUFS6	NADH:Ubiquinone Oxidoreductase Subunit S6
NDUFA6	NADH:Ubiquinone Oxidoreductase Subunit A6
NDUFAF4	NADH:Ubiquinone Oxidoreductase Complex Assembly Factor 4
NDUFV2	NADH:Ubiquinone Oxidoreductase Core Subunit V2
NDUFAF2	NADH:Ubiquinone Oxidoreductase Complex Assembly Factor 2
PITRM1	Pitrilysin Metallopeptidase 1
PNPLA8	Patatin Like Phospholipase Domain Containing 8
FOXRED1	FAD Dependent Oxidoreductase Domain Containing 1
NDUFB3	NADH:Ubiquinone Oxidoreductase Subunit B3
NDUFAF3	NADH:Ubiquinone Oxidoreductase Complex Assembly Factor 3
NUBPL	NUBP Iron-Sulfur Cluster Assembly Factor, Mitochondrial
NDUFA11	NADH:Ubiquinone Oxidoreductase Subunit A11
SLC25A26	Solute Carrier Family 25 Member 26
TMEM126B	Transmembrane Protein 126B
COX6A2	Cytochrome C Oxidase Subunit 6A2
COX16	Cytochrome C Oxidase Assembly Factor COX16
LIPT2	Lipoyl(Octanoyl) Transferase 2
NDUFAF8	NADH:Ubiquinone Oxidoreductase Complex Assembly Factor 8
MT-TF	Mitochondrially Encoded TRNA-Phe (UUU/C)
IGF2	Insulin Like Growth Factor 2
GPR35	G Protein-Coupled Receptor 35
LPAR2	Lysophosphatidic Acid Receptor 2
USP2-AS1	USP2 Antisense RNA 1
ACAT1	Acetyl-CoA Acetyltransferase 1
CAD	Carbamoyl-Phosphate Synthetase 2, Aspartate Transcarbamylase, And Dihydroorotase
EDN1	Endothelin 1
FOXA2	Forkhead Box A2
MYH10	Myosin Heavy Chain 10
PRDX2	Peroxiredoxin 2
THBS1	Thrombospondin 1
CEBPB	CCAAT Enhancer Binding Protein Beta
CTPS1	CTP Synthase 1
HMGB3	High Mobility Group Box 3
PSMC1	Proteasome 26S Subunit, ATPase 1
STIP1	Stress Induced Phosphoprotein 1
UPF1	UPF1 RNA Helicase And ATPase
CYFIP1	Cytoplasmic FMR1 Interacting Protein 1
RPL13A	Ribosomal Protein L13a
TAB3	TGF-Beta Activated Kinase 1 (MAP3K7) Binding Protein 3
HAT1	Histone Acetyltransferase 1
RPL19	Ribosomal Protein L19
KDM4D	Lysine Demethylase 4D
MTCH2	Mitochondrial Carrier 2
ZFR	Zinc Finger RNA Binding Protein
ARL5B	ADP Ribosylation Factor Like GTPase 5B
IL27	Interleukin 27
KHDRBS3	KH RNA Binding Domain Containing, Signal Transduction Associated 3
NHERF2	NHERF Family PDZ Scaffold Protein 2
IPO7	Importin 7
KLF9	KLF Transcription Factor 9
PALMD	Palmdelphin
ZFP41	ZFP41 Zinc Finger Protein
MIR132	MicroRNA 132
MT-RNR2	Mitochondrially Encoded 16S RRNA
MIR223	MicroRNA 223
MIR302A	MicroRNA 302a
MIR215	MicroRNA 215
MIR377	MicroRNA 377
MIR497	MicroRNA 497
MIR498	MicroRNA 498
LINC00184	Long Intergenic Non-Protein Coding RNA 184
MIR194-1	MicroRNA 194-1
IGFL2-AS1	IGFL2 Antisense RNA 1
FTO-IT1	FTO Intronic Transcript 1
SLC11A2	Solute Carrier Family 11 Member 2
PML	PML Nuclear Body Scaffold
C5AR1	Complement C5a Receptor 1
CLOCK	Clock Circadian Regulator
PER2	Period Circadian Regulator 2
BMAL1	Basic Helix-Loop-Helix ARNT Like 1
DDX17	DEAD-Box Helicase 17
DEK	DEK Proto-Oncogene
PSME3	Proteasome Activator Subunit 3
H3-3B	H3.3 Histone B
LIMA1	LIM Domain And Actin Binding 1
ZFP36	ZFP36 Ring Finger Protein
MTHFD2	Methylenetetrahydrofolate Dehydrogenase (NADP+ Dependent) 2, Methenyltetrahydrofolate Cyclohydrolase
H2BC1	H2B Clustered Histone 1
MIR500A	MicroRNA 500a
FOS	Fos Proto-Oncogene, AP-1 Transcription Factor Subunit
ABCC1	ATP Binding Cassette Subfamily C Member 1 (ABCC1 Blood Group)
P3H3	Prolyl 3-Hydroxylase 3
KDM8	Lysine Demethylase 8
IMPDH2	Inosine Monophosphate Dehydrogenase 2
CCN2	Cellular Communication Network Factor 2
PPT1	Palmitoyl-Protein Thioesterase 1
RPL5	Ribosomal Protein L5
SLC6A8	Solute Carrier Family 6 Member 8
SPTLC2	Serine Palmitoyltransferase Long Chain Base Subunit 2
C1QBP	Complement C1q Binding Protein
CANX	Calnexin
CDC20	Cell Division Cycle 20
IGFBP7	Insulin Like Growth Factor Binding Protein 7
NUMA1	Nuclear Mitotic Apparatus Protein 1
TK1	Thymidine Kinase 1
DHCR24	24-Dehydrocholesterol Reductase
ALDH1B1	Aldehyde Dehydrogenase 1 Family Member B1
DPF2	Double PHD Fingers 2
FOXP2	Forkhead Box P2
H1-4	H1.4 Linker Histone, Cluster Member
RBBP4	RB Binding Protein 4, Chromatin Remodeling Factor
SLC27A4	Solute Carrier Family 27 Member 4
AMFR	Autocrine Motility Factor Receptor
FOXC1	Forkhead Box C1
MPDZ	Multiple PDZ Domain Crumbs Cell Polarity Complex Component
MVD	Mevalonate Diphosphate Decarboxylase
SLC3A2	Solute Carrier Family 3 Member 2
EIF3A	Eukaryotic Translation Initiation Factor 3 Subunit A
HIPK2	Homeodomain Interacting Protein Kinase 2
PDLIM7	PDZ And LIM Domain 7
PSMD7	Proteasome 26S Subunit, Non-ATPase 7
RBM10	RNA Binding Motif Protein 10
ZBTB18	Zinc Finger And BTB Domain Containing 18
AGK	Acylglycerol Kinase
FKBP8	FKBP Prolyl Isomerase 8
HNRNPR	Heterogeneous Nuclear Ribonucleoprotein R
PA2G4	Proliferation-Associated 2G4
PCBP2	Poly(RC) Binding Protein 2
ADSS2	Adenylosuccinate Synthase 2
FAF2	Fas Associated Factor Family Member 2
SUPT16H	SPT16 Homolog, Facilitates Chromatin Remodeling Subunit
SV2B	Synaptic Vesicle Glycoprotein 2B
USP28	Ubiquitin Specific Peptidase 28
H1-5	H1.5 Linker Histone, Cluster Member
PRDX4	Peroxiredoxin 4
PSMD6	Proteasome 26S Subunit, Non-ATPase 6
ARL1	ADP Ribosylation Factor Like GTPase 1
PALS1	Protein Associated With LIN7 1, MAGUK P55 Family Member
RPL17	Ribosomal Protein L17
TEAD3	TEA Domain Transcription Factor 3
TP53INP1	Tumor Protein P53 Inducible Nuclear Protein 1
AJUBA	Ajuba LIM Protein
FLG2	Filaggrin 2
AHNAK	AHNAK Nucleoprotein
PATJ	PATJ Crumbs Cell Polarity Complex Component
PTPRH	Protein Tyrosine Phosphatase Receptor Type H
SLC16A10	Solute Carrier Family 16 Member 10
TWF1	Twinfilin Actin Binding Protein 1
CSTF1	Cleavage Stimulation Factor Subunit 1
DNAAF5	Dynein Axonemal Assembly Factor 5
MMS19	MMS19 Homolog, Cytosolic Iron-Sulfur Assembly Component
AMOTL1	Angiomotin Like 1
CIAPIN1	Cytokine Induced Apoptosis Inhibitor 1
CNN2	Calponin 2
DNAJC10	DnaJ Heat Shock Protein Family (Hsp40) Member C10
GCN1	GCN1 Activator Of EIF2AK4
ISLR	Immunoglobulin Superfamily Containing Leucine Rich Repeat
LIN7C	Lin-7 Homolog C, Crumbs Cell Polarity Complex Component
MYBBP1A	MYB Binding Protein 1a
CCDC85C	Coiled-Coil Domain Containing 85C
EIF3L	Eukaryotic Translation Initiation Factor 3 Subunit L
TUBGCP3	Tubulin Gamma Complex Component 3
H1-10	H1.10 Linker Histone
JPT2	Jupiter Microtubule Associated Homolog 2
WWC3	WWC Family Member 3
AMOTL2	Angiomotin Like 2
SNHG15	Small Nucleolar RNA Host Gene 15
ATP1A1-AS1	ATP1A1 Antisense RNA 1
MIR373	MicroRNA 373
MIR615	MicroRNA 615
MIR202	MicroRNA 202
MIR29C	MicroRNA 29c
SNHG8	Small Nucleolar RNA Host Gene 8
ADAMTS9-AS2	ADAMTS9 Antisense RNA 2
ZFP91-CNTF	ZFP91-CNTF Readthrough (NMD Candidate)
LINC00926	Long Intergenic Non-Protein Coding RNA 926
MIR210HG	MIR210 Host Gene
MIR507	MicroRNA 507
LINC00662	Long Intergenic Non-Protein Coding RNA 662
GAS1RR	GAS1 Adjacent Regulatory RNA
MIR134	MicroRNA 134
CA2	Carbonic Anhydrase 2
HDAC8	Histone Deacetylase 8
ACTA2	Actin Alpha 2, Smooth Muscle
GNAI1	G Protein Subunit Alpha I1
CXCL12	C-X-C Motif Chemokine Ligand 12
FTL	Ferritin Light Chain
PBRM1	Polybromo 1
TFE3	Transcription Factor Binding To IGHM Enhancer 3
KDM4A	Lysine Demethylase 4A
SEC23B	SEC23 Homolog B, COPII Coat Complex Component
RARRES1	Retinoic Acid Receptor Responder 1
MLLT3	MLLT3 Super Elongation Complex Subunit
CCAR2	Cell Cycle And Apoptosis Regulator 2
CIRBP	Cold Inducible RNA Binding Protein
MRPL40	Mitochondrial Ribosomal Protein L40
ZFP91	ZFP91 Zinc Finger Protein, Atypical E3 Ubiquitin Ligase
H4C9	H4 Clustered Histone 9
MIR208B	MicroRNA 208b
MIR524	MicroRNA 524
NTRK2	Neurotrophic Receptor Tyrosine Kinase 2
ATP2A2	ATPase Sarcoplasmic/Endoplasmic Reticulum Ca2+ Transporting 2
PRKAR1A	Protein Kinase CAMP-Dependent Type I Regulatory Subunit Alpha
ADK	Adenosine Kinase
CDKN1A	Cyclin Dependent Kinase Inhibitor 1A
MSH6	MutS Homolog 6
SLC1A3	Solute Carrier Family 1 Member 3
TNFAIP3	TNF Alpha Induced Protein 3
CTLA4	Cytotoxic T-Lymphocyte Associated Protein 4
GGCX	Gamma-Glutamyl Carboxylase
ACTN4	Actinin Alpha 4
KDM6A	Lysine Demethylase 6A
SLC29A1	Solute Carrier Family 29 Member 1 (Augustine Blood Group)
ALDH3A1	Aldehyde Dehydrogenase 3 Family Member A1
ALDH3A2	Aldehyde Dehydrogenase 3 Family Member A2
MARS1	Methionyl-TRNA Synthetase 1
STT3A	STT3 Oligosaccharyltransferase Complex Catalytic Subunit A
ARF1	ADP Ribosylation Factor 1
ATP6AP2	ATPase H+ Transporting Accessory Protein 2
DDOST	Dolichyl-Diphosphooligosaccharide--Protein Glycosyltransferase Non-Catalytic Subunit
IARS1	Isoleucyl-TRNA Synthetase 1
LCN2	Lipocalin 2
LMAN1	Lectin, Mannose Binding 1
PSMA3	Proteasome 20S Subunit Alpha 3
RARS1	Arginyl-TRNA Synthetase 1
TNFSF10	TNF Superfamily Member 10
ADCY10	Adenylate Cyclase 10
ATP5PO	ATP Synthase Peripheral Stalk Subunit OSCP
COPB2	COPI Coat Complex Subunit Beta 2
EIF2B5	Eukaryotic Translation Initiation Factor 2B Subunit Epsilon
ELP1	Elongator Acetyltransferase Complex Subunit 1
ERLIN2	ER Lipid Raft Associated 2
NOX1	NADPH Oxidase 1
PSMC3	Proteasome 26S Subunit, ATPase 3
RPL10	Ribosomal Protein L10
SMURF2	SMAD Specific E3 Ubiquitin Protein Ligase 2
ATXN10	Ataxin 10
CBX3	Chromobox 3
IL22	Interleukin 22
IRF6	Interferon Regulatory Factor 6
KIF22	Kinesin Family Member 22
NDUFA8	NADH:Ubiquinone Oxidoreductase Subunit A8
PRPF31	Pre-MRNA Processing Factor 31
ACTR2	Actin Related Protein 2
ALDH9A1	Aldehyde Dehydrogenase 9 Family Member A1
CDIPT	CDP-Diacylglycerol--Inositol 3-Phosphatidyltransferase
GNL3	G Protein Nucleolar 3
KRIT1	KRIT1 Ankyrin Repeat Containing
PRKAR2B	Protein Kinase CAMP-Dependent Type II Regulatory Subunit Beta
PSMA1	Proteasome 20S Subunit Alpha 1
RPN1	Ribophorin I
SAE1	SUMO1 Activating Enzyme Subunit 1
SEC61A1	SEC61 Translocon Subunit Alpha 1
SSR4	Signal Sequence Receptor Subunit 4
TNPO1	Transportin 1
TRIP13	Thyroid Hormone Receptor Interactor 13
VAPA	VAMP Associated Protein A
TMED10	Transmembrane P24 Trafficking Protein 10
ACTR3	Actin Related Protein 3
GART	Phosphoribosylglycinamide Formyltransferase, Phosphoribosylglycinamide Synthetase, Phosphoribosylaminoimidazole Synthetase
LMAN2	Lectin, Mannose Binding 2
CCT4	Chaperonin Containing TCP1 Subunit 4
DNAJC7	DnaJ Heat Shock Protein Family (Hsp40) Member C7
GEMIN4	Gem Nuclear Organelle Associated Protein 4
IPO8	Importin 8
RPL23	Ribosomal Protein L23
SCFD1	Sec1 Family Domain Containing 1
SNRPA	Small Nuclear Ribonucleoprotein Polypeptide A
SNRPD2	Small Nuclear Ribonucleoprotein D2 Polypeptide
SRSF3	Serine And Arginine Rich Splicing Factor 3
WTAP	WT1 Associated Protein
PHLPP1	PH Domain And Leucine Rich Repeat Protein Phosphatase 1
PRDM14	PR/SET Domain 14
RPS13	Ribosomal Protein S13
SETD5	SET Domain Containing 5
USP21	Ubiquitin Specific Peptidase 21
ANKRD17	Ankyrin Repeat Domain 17
PDS5A	PDS5 Cohesin Associated Factor A
CACYBP	Calcyclin Binding Protein
DNAJA3	DnaJ Heat Shock Protein Family (Hsp40) Member A3
MGA	MAX Dimerization Protein MGA
PPP2R3A	Protein Phosphatase 2 Regulatory Subunit B''Alpha
RPL36	Ribosomal Protein L36
SSR1	Signal Sequence Receptor Subunit 1
VDAC3	Voltage Dependent Anion Channel 3
DNAJA2	DnaJ Heat Shock Protein Family (Hsp40) Member A2
NCLN	Nicalin
SSR3	Signal Sequence Receptor Subunit 3
CENPU	Centromere Protein U
NACA	Nascent Polypeptide Associated Complex Subunit Alpha
TBC1D15	TBC1 Domain Family Member 15
OVOL2	Ovo Like Zinc Finger 2
RPL30	Ribosomal Protein L30
THOC3	THO Complex Subunit 3
XPOT	Exportin For TRNA
SRPRB	SRP Receptor Subunit Beta
GNRH2	Gonadotropin Releasing Hormone 2
SEC22B	SEC22 Homolog B, Vesicle Trafficking Protein
CENPL	Centromere Protein L
FSD1	Fibronectin Type III And SPRY Domain Containing 1
DLEU1	Deleted In Lymphocytic Leukemia 1
TMEM105	TMEM105 Long Non-Coding RNA
TIMM23B	Translocase Of Inner Mitochondrial Membrane 23 Homolog B
MIRLET7B	MicroRNA Let-7b
MIR101-1	MicroRNA 101-1
MIR128-2	MicroRNA 128-2
MIR675	MicroRNA 675
LINC00518	Long Intergenic Non-Protein Coding RNA 518
MIR137	MicroRNA 137
PTTG3P	Pituitary Tumor-Transforming 3, Pseudogene
MIR489	MicroRNA 489
PTCSC3	Papillary Thyroid Carcinoma Susceptibility Candidate 3
SBF2-AS1	SBF2 Antisense RNA 1
MIR194-2	MicroRNA 194-2
LINC02446	Long Intergenic Non-Protein Coding RNA 2446
MIR1287	MicroRNA 1287
LINC02899	Long Intergenic Non-Protein Coding RNA 2899
LINC01614	Long Intergenic Non-Protein Coding RNA 1614
LINC02273	Long Intergenic Non-Protein Coding RNA 2273
MAPK14	Mitogen-Activated Protein Kinase 14
LDHAL6A	Lactate Dehydrogenase A Like 6A
CXCR4	C-X-C Motif Chemokine Receptor 4
AURKB	Aurora Kinase B
CBL	Cbl Proto-Oncogene
MAP3K7	Mitogen-Activated Protein Kinase Kinase Kinase 7
EIF2AK2	Eukaryotic Translation Initiation Factor 2 Alpha Kinase 2
LAMB1	Laminin Subunit Beta 1
TNC	Tenascin C
CASP1	Caspase 1
MTAP	Methylthioadenosine Phosphorylase
NCSTN	Nicastrin
TAB2	TGF-Beta Activated Kinase 1 (MAP3K7) Binding Protein 2
ESR2	Estrogen Receptor 2
FLNA	Filamin A
RPS19	Ribosomal Protein S19
TUBG1	Tubulin Gamma 1
BIRC2	Baculoviral IAP Repeat Containing 2
CLU	Clusterin
IGF2R	Insulin Like Growth Factor 2 Receptor
NRP1	Neuropilin 1
EIF4EBP1	Eukaryotic Translation Initiation Factor 4E Binding Protein 1
FANCD2	FA Complementation Group D2
MAT2A	Methionine Adenosyltransferase 2A
NME1	NME/NM23 Nucleoside Diphosphate Kinase 1
PAX5	Paired Box 5
SLC4A4	Solute Carrier Family 4 Member 4
STS	Steroid Sulfatase
TOR1A	Torsin Family 1 Member A
ALG1	ALG1 Chitobiosyldiphosphodolichol Beta-Mannosyltransferase
ATP6V1A	ATPase H+ Transporting V1 Subunit A
EIF2S3	Eukaryotic Translation Initiation Factor 2 Subunit Gamma
GPT2	Glutamic--Pyruvic Transaminase 2
GSTM3	Glutathione S-Transferase Mu 3
ISL1	ISL LIM Homeobox 1
KIF5A	Kinesin Family Member 5A
MAP1B	Microtubule Associated Protein 1B
NT5C2	5'-Nucleotidase, Cytosolic II
PSMA7	Proteasome 20S Subunit Alpha 7
PSMD4	Proteasome 26S Subunit Ubiquitin Receptor, Non-ATPase 4
RFC1	Replication Factor C Subunit 1
SKI	SKI Proto-Oncogene
ABCD3	ATP Binding Cassette Subfamily D Member 3
ATP6AP1	ATPase H+ Transporting Accessory Protein 1
COL4A5	Collagen Type IV Alpha 5 Chain
HERC2	HECT And RLD Domain Containing E3 Ubiquitin Protein Ligase 2
RAD23B	RAD23 Homolog B, Nucleotide Excision Repair Protein
RUVBL1	RuvB Like AAA ATPase 1
SALL4	Spalt Like Transcription Factor 4
SET	SET Nuclear Proto-Oncogene
AGO2	Argonaute RISC Catalytic Component 2
ATP6V0A2	ATPase H+ Transporting V0 Subunit A2
CDC37	Cell Division Cycle 37, HSP90 Cochaperone
DARS1	Aspartyl-TRNA Synthetase 1
EBP	EBP Cholestenol Delta-Isomerase
EIF2B2	Eukaryotic Translation Initiation Factor 2B Subunit Beta
FSCN1	Fascin Actin-Bundling Protein 1
GBF1	Golgi Brefeldin A Resistant Guanine Nucleotide Exchange Factor 1
GREM1	Gremlin 1, DAN Family BMP Antagonist
NRIP1	Nuclear Receptor Interacting Protein 1
PON2	Paraoxonase 2
PSMB1	Proteasome 20S Subunit Beta 1
PTDSS1	Phosphatidylserine Synthase 1
PTGES3	Prostaglandin E Synthase 3
PTRH2	Peptidyl-TRNA Hydrolase 2
RNF2	Ring Finger Protein 2
SEMA3C	Semaphorin 3C
STT3B	STT3 Oligosaccharyltransferase Complex Catalytic Subunit B
TFDP1	Transcription Factor Dp-1
UFD1	Ubiquitin Recognition Factor In ER Associated Degradation 1
YARS1	Tyrosyl-TRNA Synthetase 1
ARF6	ADP Ribosylation Factor 6
CERS2	Ceramide Synthase 2
CHST14	Carbohydrate Sulfotransferase 14
CYP51A1	Cytochrome P450 Family 51 Subfamily A Member 1
DNAJB2	DnaJ Heat Shock Protein Family (Hsp40) Member B2
FANCI	FA Complementation Group I
FARSB	Phenylalanyl-TRNA Synthetase Subunit Beta
FBXO11	F-Box Protein 11
GNB4	G Protein Subunit Beta 4
GOLGA2	Golgin A2
HAX1	HCLS1 Associated Protein X-1
MANBA	Mannosidase Beta
NDUFA9	NADH:Ubiquinone Oxidoreductase Subunit A9
PDCD4	Programmed Cell Death 4
PIGK	Phosphatidylinositol Glycan Anchor Biosynthesis Class K
PSMC4	Proteasome 26S Subunit, ATPase 4
PYGB	Glycogen Phosphorylase B
RARS2	Arginyl-TRNA Synthetase 2, Mitochondrial
RPL35	Ribosomal Protein L35
RPS26	Ribosomal Protein S26
SLC10A1	Solute Carrier Family 10 Member 1
SOAT1	Sterol O-Acyltransferase 1
TMEM43	Transmembrane Protein 43
UBQLN2	Ubiquilin 2
ADRM1	ADRM1 26S Proteasome Ubiquitin Receptor
APLP2	Amyloid Beta Precursor Like Protein 2
CRTAP	Cartilage Associated Protein
DDX20	DEAD-Box Helicase 20
DYNC1I2	Dynein Cytoplasmic 1 Intermediate Chain 2
EIF3F	Eukaryotic Translation Initiation Factor 3 Subunit F
ELMO2	Engulfment And Cell Motility 2
FAR1	Fatty Acyl-CoA Reductase 1
FBXW11	F-Box And WD Repeat Domain Containing 11
FOXO4	Forkhead Box O4
MBD1	Methyl-CpG Binding Domain Protein 1
MYBL2	MYB Proto-Oncogene Like 2
OS9	OS9 Endoplasmic Reticulum Lectin
PEX3	Peroxisomal Biogenesis Factor 3
PLD3	Phospholipase D Family Member 3
PSMB2	Proteasome 20S Subunit Beta 2
PSMD12	Proteasome 26S Subunit, Non-ATPase 12
RPL27	Ribosomal Protein L27
SLC7A1	Solute Carrier Family 7 Member 1
STOM	Stomatin
TMEM38B	Transmembrane Protein 38B
TNPO3	Transportin 3
VANGL1	VANGL Planar Cell Polarity Protein 1
VPS13A	Vacuolar Protein Sorting 13 Homolog A
XPO5	Exportin 5
ATG9A	Autophagy Related 9A
BIRC6	Baculoviral IAP Repeat Containing 6
MTA2	Metastasis Associated 1 Family Member 2
NCAPD2	Non-SMC Condensin I Complex Subunit D2
P3H1	Prolyl 3-Hydroxylase 1
PIGS	Phosphatidylinositol Glycan Anchor Biosynthesis Class S
PSMB6	Proteasome 20S Subunit Beta 6
PTN	Pleiotrophin
RPS29	Ribosomal Protein S29
SEL1L	SEL1L Adaptor Subunit Of SYVN1 Ubiquitin Ligase
SMN1	Survival Of Motor Neuron 1, Telomeric
SNRPE	Small Nuclear Ribonucleoprotein Polypeptide E
SSBP1	Single Stranded DNA Binding Protein 1
AKAP12	A-Kinase Anchoring Protein 12
ARF3	ADP Ribosylation Factor 3
CBY1	Chibby 1, Beta Catenin Antagonist
CKAP5	Cytoskeleton Associated Protein 5
CNOT1	CCR4-NOT Transcription Complex Subunit 1
DCTN2	Dynactin Subunit 2
DDX21	DExD-Box Helicase 21
EIF3H	Eukaryotic Translation Initiation Factor 3 Subunit H
EXOC4	Exocyst Complex Component 4
EXOC5	Exocyst Complex Component 5
GET3	Guided Entry Of Tail-Anchored Proteins Factor 3, ATPase
HS2ST1	Heparan Sulfate 2-O-Sulfotransferase 1
MAGED2	MAGE Family Member D2
MTX2	Metaxin 2
NPLOC4	NPL4 Homolog, Ubiquitin Recognition Factor
RANBP1	RAN Binding Protein 1
RPS23	Ribosomal Protein S23
RPS28	Ribosomal Protein S28
SF3B2	Splicing Factor 3b Subunit 2
STK38L	Serine/Threonine Kinase 38 Like
TELO2	Telomere Maintenance 2
TMEM165	Transmembrane Protein 165
TSPYL1	TSPY Like 1
TUBGCP2	Tubulin Gamma Complex Component 2
TUBGCP4	Tubulin Gamma Complex Component 4
UBIAD1	UbiA Prenyltransferase Domain Containing 1
ZMPSTE24	Zinc Metallopeptidase STE24
ALG13	ALG13 UDP-N-Acetylglucosaminyltransferase Subunit
ANAPC1	Anaphase Promoting Complex Subunit 1
B3GALT5	Beta-1,3-Galactosyltransferase 5
BTAF1	B-TFIID TATA-Box Binding Protein Associated Factor 1
CADPS2	Calcium Dependent Secretion Activator 2
CEPT1	Choline/Ethanolamine Phosphotransferase 1
CLPTM1L	CLPTM1 Like
COG8	Component Of Oligomeric Golgi Complex 8
DYNLT1	Dynein Light Chain Tctex-Type 1
EIF3G	Eukaryotic Translation Initiation Factor 3 Subunit G
EMC1	ER Membrane Protein Complex Subunit 1
EXOC7	Exocyst Complex Component 7
MFAP2	Microfibril Associated Protein 2
MYL6	Myosin Light Chain 6
NSRP1	Nuclear Speckle Splicing Regulatory Protein 1
PSMB3	Proteasome 20S Subunit Beta 3
PSMD8	Proteasome 26S Subunit, Non-ATPase 8
RCN1	Reticulocalbin 1
RINT1	RAD50 Interactor 1
RTN3	Reticulon 3
SLC7A6	Solute Carrier Family 7 Member 6
SMC4	Structural Maintenance Of Chromosomes 4
TMCO1	Transmembrane And Coiled-Coil Domains 1
ARFGEF1	ADP Ribosylation Factor Guanine Nucleotide Exchange Factor 1
ATP1B3	ATPase Na+/K+ Transporting Subunit Beta 3
BMS1	BMS1 Ribosome Biogenesis Factor
CCDC47	Coiled-Coil Domain Containing 47
CHCHD3	Coiled-Coil-Helix-Coiled-Coil-Helix Domain Containing 3
CHP1	Calcineurin Like EF-Hand Protein 1
CLN6	CLN6 Transmembrane ER Protein
COPG1	COPI Coat Complex Subunit Gamma 1
CPD	Carboxypeptidase D
DAD1	Defender Against Cell Death 1
DCAF8	DDB1 And CUL4 Associated Factor 8
DPPA4	Developmental Pluripotency Associated 4
EIF3M	Eukaryotic Translation Initiation Factor 3 Subunit M
EIF5	Eukaryotic Translation Initiation Factor 5
FAM3C	FAM3 Metabolism Regulating Signaling Molecule C
GLMN	Glomulin, FKBP Associated Protein
LUC7L3	LUC7 Like 3 Pre-MRNA Splicing Factor
NCDN	Neurochondrin
NDUFB7	NADH:Ubiquinone Oxidoreductase Subunit B7
OSBPL8	Oxysterol Binding Protein Like 8
PAG1	Phosphoprotein Membrane Anchor With Glycosphingolipid Microdomains 1
PIGU	Phosphatidylinositol Glycan Anchor Biosynthesis Class U
PSMB7	Proteasome 20S Subunit Beta 7
PSMD11	Proteasome 26S Subunit, Non-ATPase 11
RIF1	Replication Timing Regulatory Factor 1
RMND1	Required For Meiotic Nuclear Division 1 Homolog
RPS15	Ribosomal Protein S15
RPS5	Ribosomal Protein S5
SASH1	SAM And SH3 Domain Containing 1
SEC61B	SEC61 Translocon Subunit Beta
SLC35B2	Solute Carrier Family 35 Member B2
SLC6A15	Solute Carrier Family 6 Member 15
SMPD4	Sphingomyelin Phosphodiesterase 4
SRP19	Signal Recognition Particle 19
SRP68	Signal Recognition Particle 68
ST13	ST13 Hsp70 Interacting Protein
STRAP	Serine/Threonine Kinase Receptor Associated Protein
THADA	THADA Armadillo Repeat Containing
TMX3	Thioredoxin Related Transmembrane Protein 3
UCHL5	Ubiquitin C-Terminal Hydrolase L5
WLS	Wnt Ligand Secretion Mediator
ZBTB24	Zinc Finger And BTB Domain Containing 24
CERS6	Ceramide Synthase 6
CLCC1	Chloride Channel CLIC Like 1
EXOC8	Exocyst Complex Component 8
FAU	FAU Ubiquitin Like And Ribosomal Protein S30 Fusion
HOXA3	Homeobox A3
NOLC1	Nucleolar And Coiled-Body Phosphoprotein 1
SAR1A	Secretion Associated Ras Related GTPase 1A
SLC30A7	Solute Carrier Family 30 Member 7
TMEM59	Transmembrane Protein 59
ATAD3B	ATPase Family AAA Domain Containing 3B
ATP5PD	ATP Synthase Peripheral Stalk Subunit D
ATP6V1H	ATPase H+ Transporting V1 Subunit H
AUP1	AUP1 Lipid Droplet Regulating VLDL Assembly Factor
CDC123	Cell Division Cycle 123
CDS2	CDP-Diacylglycerol Synthase 2
CPNE1	Copine 1
EI24	EI24 Autophagy Associated Transmembrane Protein
GEMIN5	Gem Nuclear Organelle Associated Protein 5
GOLGA3	Golgin A3
HM13	Histocompatibility Minor 13
HNRNPAB	Heterogeneous Nuclear Ribonucleoprotein A/B
ILVBL	IlvB Acetolactate Synthase Like
IPO13	Importin 13
L3MBTL2	L3MBTL Histone Methyl-Lysine Binding Protein 2
OTUD4	OTU Deubiquitinase 4
POMK	Protein O-Mannose Kinase
RAB32	RAB32, Member RAS Oncogene Family
RBM5	RNA Binding Motif Protein 5
RFC3	Replication Factor C Subunit 3
RPS9	Ribosomal Protein S9
SNRPD3	Small Nuclear Ribonucleoprotein D3 Polypeptide
SNRPG	Small Nuclear Ribonucleoprotein Polypeptide G
SPIN1	Spindlin 1
STX18	Syntaxin 18
TFB2M	Transcription Factor B2, Mitochondrial
TMTC3	Transmembrane O-Mannosyltransferase Targeting Cadherins 3
TTI1	TELO2 Interacting Protein 1
TXNDC5	Thioredoxin Domain Containing 5
UBAC2	UBA Domain Containing 2
VKORC1L1	Vitamin K Epoxide Reductase Complex Subunit 1 Like 1
ZW10	Zw10 Kinetochore Protein
ACTR1A	Actin Related Protein 1A
CCDC8	Coiled-Coil Domain Containing 8
CLPTM1	CLPTM1 Regulator Of GABA Type A Receptor Forward Trafficking
COPE	COPI Coat Complex Subunit Epsilon
DERL1	Derlin 1
ERGIC3	ERGIC And Golgi 3
GRWD1	Glutamate Rich WD Repeat Containing 1
IPO11	Importin 11
LPCAT1	Lysophosphatidylcholine Acyltransferase 1
PDXDC1	Pyridoxal Dependent Decarboxylase Domain Containing 1
RMDN3	Regulator Of Microtubule Dynamics 3
RMND5A	Required For Meiotic Nuclear Division 5 Homolog A
TMED1	Transmembrane P24 Trafficking Protein 1
TMEM41B	Transmembrane Protein 41B
TOR3A	Torsin Family 3 Member A
XPO7	Exportin 7
ABLIM1	Actin Binding LIM Protein 1
ANKRD13A	Ankyrin Repeat Domain 13A
CHPT1	Choline Phosphotransferase 1
ERGIC2	ERGIC And Golgi 2
FNDC3B	Fibronectin Type III Domain Containing 3B
PSMD13	Proteasome 26S Subunit, Non-ATPase 13
SNRPA1	Small Nuclear Ribonucleoprotein Polypeptide A'
YIPF3	Yip1 Domain Family Member 3
ARL6IP5	ADP Ribosylation Factor Like GTPase 6 Interacting Protein 5
CIAO2B	Cytosolic Iron-Sulfur Assembly Component 2B
FAM3A	FAM3 Metabolism Regulating Signaling Molecule A
GCC2	GRIP And Coiled-Coil Domain Containing 2
GET4	Guided Entry Of Tail-Anchored Proteins Factor 4
GID4	GID Complex Subunit 4 Homolog
ITM2C	Integral Membrane Protein 2C
LAPTM4A	Lysosomal Protein Transmembrane 4 Alpha
MTCH1	Mitochondrial Carrier 1
NOM1	Nucleolar Protein With MIF4G Domain 1
NOMO1	NODAL Modulator 1
PCGF6	Polycomb Group Ring Finger 6
RBM6	RNA Binding Motif Protein 6
RPAP1	RNA Polymerase II Associated Protein 1
SAMM50	SAMM50 Sorting And Assembly Machinery Component
SF3B6	Splicing Factor 3b Subunit 6
SGTA	Small Glutamine Rich Tetratricopeptide Repeat Co-Chaperone Alpha
SMC2	Structural Maintenance Of Chromosomes 2
TMEM115	Transmembrane Protein 115
TMEM201	Transmembrane Protein 201
TMX1	Thioredoxin Related Transmembrane Protein 1
WRNIP1	WRN Helicase Interacting Protein 1
ACAP2	ArfGAP With Coiled-Coil, Ankyrin Repeat And PH Domains 2
ANGEL1	Angel Homolog 1
ARHGAP12	Rho GTPase Activating Protein 12
CLGN	Calmegin
CLNS1A	Chloride Nucleotide-Sensitive Channel 1A
EMC2	ER Membrane Protein Complex Subunit 2
ERH	ERH MRNA Splicing And Mitosis Factor
GEMIN6	Gem Nuclear Organelle Associated Protein 6
HDX	Highly Divergent Homeobox
INTS2	Integrator Complex Subunit 2
LTN1	Listerin E3 Ubiquitin Protein Ligase 1
QARS1	Glutaminyl-TRNA Synthetase 1
RABL3	RAB, Member Of RAS Oncogene Family Like 3
SPCS2	Signal Peptidase Complex Subunit 2
TRAFD1	TRAF-Type Zinc Finger Domain Containing 1
TRIM11	Tripartite Motif Containing 11
AKAP8L	A-Kinase Anchoring Protein 8 Like
ARMCX3	Armadillo Repeat Containing X-Linked 3
CPEB4	Cytoplasmic Polyadenylation Element Binding Protein 4
FAM8A1	Family With Sequence Similarity 8 Member A1
HEATR3	HEAT Repeat Containing 3
HNRNPA0	Heterogeneous Nuclear Ribonucleoprotein A0
MEX3A	Mex-3 RNA Binding Family Member A
NDFIP1	Nedd4 Family Interacting Protein 1
PCNX1	Pecanex 1
RPS27L	Ribosomal Protein S27 Like
TBC1D9	TBC1 Domain Family Member 9
TMED9	Transmembrane P24 Trafficking Protein 9
XPO4	Exportin 4
CAMSAP3	Calmodulin Regulated Spectrin Associated Protein Family Member 3
CDKL2	Cyclin Dependent Kinase Like 2
DNAJC16	DnaJ Heat Shock Protein Family (Hsp40) Member C16
DPY19L1	Dpy-19 Like C-Mannosyltransferase 1
FASTKD5	FAST Kinase Domains 5
GPN3	GPN-Loop GTPase 3
SAAL1	Serum Amyloid A Like 1
SLAIN2	SLAIN Motif Family Member 2
TM9SF3	Transmembrane 9 Superfamily Member 3
UBL4A	Ubiquitin Like 4A
ZNF131	Zinc Finger Protein 131
CNIH4	Cornichon Family Member 4
DNAJB12	DnaJ Heat Shock Protein Family (Hsp40) Member B12
PPP2R2D	Protein Phosphatase 2 Regulatory Subunit Bdelta
RANBP6	RAN Binding Protein 6
RHBDD3	Rhomboid Domain Containing 3
RNF126	Ring Finger Protein 126
TMEM106C	Transmembrane Protein 106C
TMEM161A	Transmembrane Protein 161A
ZBTB10	Zinc Finger And BTB Domain Containing 10
COPRS	Coordinator Of PRMT5 And Differentiation Stimulator
ECPAS	Ecm29 Proteasome Adaptor And Scaffold
EMC6	ER Membrane Protein Complex Subunit 6
GOLT1B	Golgi Transport 1B
MMS22L	MMS22 Like, DNA Repair Protein
MON2	MON2 Homolog, Regulator Of Endosome-To-Golgi Trafficking
OSTC	Oligosaccharyltransferase Complex Non-Catalytic Subunit
TMED5	Transmembrane P24 Trafficking Protein 5
TTYH3	Tweety Family Member 3
ZBTB1	Zinc Finger And BTB Domain Containing 1
ARMC6	Armadillo Repeat Containing 6
EMC7	ER Membrane Protein Complex Subunit 7
FBXO17	F-Box Protein 17
MACO1	Macoilin 1
MAP7D1	MAP7 Domain Containing 1
SYS1	SYS1 Golgi Trafficking Protein
TMEM259	Transmembrane Protein 259
TTC27	Tetratricopeptide Repeat Domain 27
ZZEF1	Zinc Finger ZZ-Type And EF-Hand Domain Containing 1
TMEM109	Transmembrane Protein 109
TMEM205	Transmembrane Protein 205
ZCCHC10	Zinc Finger CCHC-Type Containing 10
TMED8	Transmembrane P24 Trafficking Protein Family Member 8
BRI3BP	BRI3 Binding Protein
MIR146A	MicroRNA 146a
MIR184	MicroRNA 184
CRNDE	Colorectal Neoplasia Differentially Expressed
MIR212	MicroRNA 212
MIR25	MicroRNA 25
MIR582	MicroRNA 582
MIR590	MicroRNA 590
NPSR1-AS1	NPSR1 Antisense RNA 1
B3GALT5-AS1	B3GALT5 Antisense RNA 1
LINC01138	Long Intergenic Non-Protein Coding RNA 1138
HLA-F-AS1	HLA-F Antisense RNA 1
LINC00659	Long Intergenic Non-Protein Coding RNA 659
MIR3195	MicroRNA 3195
MIR522	MicroRNA 522
MIR640	MicroRNA 640
MIR4689	MicroRNA 4689
CTSLP8	Cathepsin L Pseudogene 8
ETHE1	ETHE1 Persulfide Dioxygenase
GRP	Gastrin Releasing Peptide
HPR	Haptoglobin-Related Protein
P2RX7	Purinergic Receptor P2X 7
CARM1	Coactivator Associated Arginine Methyltransferase 1
CUL2	Cullin 2
MAP2K1	Mitogen-Activated Protein Kinase Kinase 1
NFKB2	Nuclear Factor Kappa B Subunit 2
PRKCD	Protein Kinase C Delta
SMAD4	SMAD Family Member 4
DNMT3B	DNA Methyltransferase 3 Beta
FLT1	Fms Related Receptor Tyrosine Kinase 1
CD36	CD36 Molecule (CD36 Blood Group)
CSNK1A1	Casein Kinase 1 Alpha 1
ROCK1	Rho Associated Coiled-Coil Containing Protein Kinase 1
STAT2	Signal Transducer And Activator Of Transcription 2
WNK1	WNK Lysine Deficient Protein Kinase 1
AHR	Aryl Hydrocarbon Receptor
CAMK2D	Calcium/Calmodulin Dependent Protein Kinase II Delta
CDK9	Cyclin Dependent Kinase 9
MAPK7	Mitogen-Activated Protein Kinase 7
PLK4	Polo Like Kinase 4
PSMA6	Proteasome 20S Subunit Alpha 6
SUMO1	Small Ubiquitin Like Modifier 1
CDC45	Cell Division Cycle 45
DPYSL2	Dihydropyrimidinase Like 2
DYNC1H1	Dynein Cytoplasmic 1 Heavy Chain 1
S100B	S100 Calcium Binding Protein B
STAG2	STAG2 Cohesin Complex Component
ANGPTL4	Angiopoietin Like 4
LARS1	Leucyl-TRNA Synthetase 1
ATP6V0C	ATPase H+ Transporting V0 Subunit C
FBXO7	F-Box Protein 7
GDF15	Growth Differentiation Factor 15
KRT7	Keratin 7
LIF	LIF Interleukin 6 Family Cytokine
P2RY2	Purinergic Receptor P2Y2
PLCE1	Phospholipase C Epsilon 1
RFC2	Replication Factor C Subunit 2
SOCS2	Suppressor Of Cytokine Signaling 2
TP53BP1	Tumor Protein P53 Binding Protein 1
USF1	Upstream Transcription Factor 1
USP1	Ubiquitin Specific Peptidase 1
APOD	Apolipoprotein D
BAZ1B	Bromodomain Adjacent To Zinc Finger Domain 1B
CBX5	Chromobox 5
DDX6	DEAD-Box Helicase 6
DSC3	Desmocollin 3
GNB2	G Protein Subunit Beta 2
ICOSLG	Inducible T Cell Costimulator Ligand
IGF2BP3	Insulin Like Growth Factor 2 MRNA Binding Protein 3
RCOR1	REST Corepressor 1
RPS27A	Ribosomal Protein S27a
RUVBL2	RuvB Like AAA ATPase 2
UGT8	UDP Glycosyltransferase 8
CST6	Cystatin E/M
DEPTOR	DEP Domain Containing MTOR Interacting Protein
LEMD3	LEM Domain Containing 3
LPA	Lipoprotein(A)
MAGT1	Magnesium Transporter 1
ONECUT1	One Cut Homeobox 1
RPLP0	Ribosomal Protein Lateral Stalk Subunit P0
SETD1A	SET Domain Containing 1A, Histone Lysine Methyltransferase
TRIP11	Thyroid Hormone Receptor Interactor 11
WDR26	WD Repeat Domain 26
OTX1	Orthodenticle Homeobox 1
TRAF7	TNF Receptor Associated Factor 7
BHLHE40	Basic Helix-Loop-Helix Family Member E40
DECR1	2,4-Dienoyl-CoA Reductase 1
HSPA6	Heat Shock Protein Family A (Hsp70) Member 6
PIEZO1	Piezo Type Mechanosensitive Ion Channel Component 1 (Er Blood Group)
POLR2B	RNA Polymerase II Subunit B
RANBP9	RAN Binding Protein 9
RBM28	RNA Binding Motif Protein 28
RPL22	Ribosomal Protein L22
SERPINA12	Serpin Family A Member 12
TGM3	Transglutaminase 3
ABCF2	ATP Binding Cassette Subfamily F Member 2
CDK17	Cyclin Dependent Kinase 17
HNRNPA3	Heterogeneous Nuclear Ribonucleoprotein A3
KLF8	KLF Transcription Factor 8
NUS1	NUS1 Dehydrodolichyl Diphosphate Synthase Subunit
QSOX1	Quiescin Sulfhydryl Oxidase 1
RFX6	Regulatory Factor X6
RPS11	Ribosomal Protein S11
SERPINB7	Serpin Family B Member 7
SLC7A8	Solute Carrier Family 7 Member 8
SRPK1	SRSF Protein Kinase 1
DDX56	DEAD-Box Helicase 56
LEMD2	LEM Domain Nuclear Envelope Protein 2
PELP1	Proline, Glutamate And Leucine Rich Protein 1
PPIH	Peptidylprolyl Isomerase H
RBM14	RNA Binding Motif Protein 14
USP53	Ubiquitin Specific Peptidase 53
CA10	Carbonic Anhydrase 10
CTNNBL1	Catenin Beta Like 1
KIF15	Kinesin Family Member 15
BMAL2	Basic Helix-Loop-Helix ARNT Like 2
CEP97	Centrosomal Protein 97
CPSF6	Cleavage And Polyadenylation Specific Factor 6
LUC7L2	LUC7 Like 2, Pre-MRNA Splicing Factor
MAEA	Macrophage Erythroblast Attacher, E3 Ubiquitin Ligase
SF3A3	Splicing Factor 3a Subunit 3
STK38	Serine/Threonine Kinase 38
YTHDF3	YTH N6-Methyladenosine RNA Binding Protein F3
ACOT9	Acyl-CoA Thioesterase 9
FOXD1	Forkhead Box D1
GSE1	Gse1 Coiled-Coil Protein
ILF3	Interleukin Enhancer Binding Factor 3
MKLN1	Muskelin 1
RANBP10	RAN Binding Protein 10
RNF130	Ring Finger Protein 130
SOX13	SRY-Box Transcription Factor 13
STYK1	Serine/Threonine/Tyrosine Kinase 1
UXT	Ubiquitously Expressed Prefoldin Like Chaperone
POF1B	POF1B Actin Binding Protein
HMG20A	High Mobility Group 20A
HMG20B	High Mobility Group 20B
HNRNPUL2	Heterogeneous Nuclear Ribonucleoprotein U Like 2
LAMTOR1	Late Endosomal/Lysosomal Adaptor, MAPK And MTOR Activator 1
RNF7	Ring Finger Protein 7
RPL18A	Ribosomal Protein L18a
SKA1	Spindle And Kinetochore Associated Complex Subunit 1
TUBG2	Tubulin Gamma 2
UBP1	Upstream Binding Protein 1
UTP14A	UTP14A Small Subunit Processome Component
GID8	GID Complex Subunit 8 Homolog
NUDT5	Nudix Hydrolase 5
PSME4	Proteasome Activator Subunit 4
SLTM	SAFB Like Transcription Modulator
UQCC3	Ubiquinol-Cytochrome C Reductase Complex Assembly Factor 3
H2AC1	H2A Clustered Histone 1
NOL10	Nucleolar Protein 10
RCOR3	REST Corepressor 3
SEC61G	SEC61 Translocon Subunit Gamma
SKA3	Spindle And Kinetochore Associated Complex Subunit 3
U2SURP	U2 SnRNP Associated SURP Domain Containing
YPEL5	Yippee Like 5
ARMC8	Armadillo Repeat Containing 8
CCDC86	Coiled-Coil Domain Containing 86
CPSF7	Cleavage And Polyadenylation Specific Factor 7
RPL36AL	Ribosomal Protein L36a Like
ANP32E	Acidic Nuclear Phosphoprotein 32 Family Member E
BARX2	BARX Homeobox 2
CMSS1	Cms1 Ribosomal Small Subunit Homolog
MCMBP	Minichromosome Maintenance Complex Binding Protein
SBSN	Suprabasin
WDCP	WD Repeat And Coiled Coil Containing
FAM83F	Family With Sequence Similarity 83 Member F
ARL6IP4	ADP Ribosylation Factor Like GTPase 6 Interacting Protein 4
RGPD3	RANBP2 Like And GRIP Domain Containing 3
ZNRD2	Zinc Ribbon Domain Containing 2
C5orf24	Chromosome 5 Open Reading Frame 24
NCCRP1	NCCRP1, F-Box Associated Domain Containing
MIR140	MicroRNA 140
MIR204	MicroRNA 204
MIR324	MicroRNA 324
MIR301A	MicroRNA 301a
FTX	FTX Transcript, XIST Regulator
MIR424	MicroRNA 424
MIR493	MicroRNA 493
HAGLR	HOXD Antisense Growth-Associated Long Non-Coding RNA
LINC00114	Long Intergenic Non-Protein Coding RNA 114
MIR511	MicroRNA 511
MIR760	MicroRNA 760
PTPRG-AS1	PTPRG Antisense RNA 1
MIR1180	MicroRNA 1180
MIR513A1	MicroRNA 513a-1
MIR635	MicroRNA 635
SNHG17	Small Nucleolar RNA Host Gene 17
MIR625	MicroRNA 625
ARLNC1	Androgen Receptor Regulated Long Noncoding RNA 1
MIR510	MicroRNA 510
MIR9-3HG	MIR9-3 Host Gene
GHET1	Gastric Carcinoma Proliferation Enhancing Transcript 1
TMEM161B-DT	TMEM161B Divergent Transcript
LINC01503	Long Intergenic Non-Protein Coding RNA 1503
MIR1262	MicroRNA 1262
MIR4677	MicroRNA 4677
MIR513A2	MicroRNA 513a-2
MIR101-2	MicroRNA 101-2
FTH1P3	Ferritin Heavy Chain 1 Pseudogene 3
LINC00908	Long Intergenic Non-Protein Coding RNA 908
LINC00960	Long Intergenic Non-Protein Coding RNA 960
LINC01060	Long Intergenic Non-Protein Coding RNA 1060
LNCPRESS1	LncRNA P53 Regulated And ESC Associated 1
LINC01093	Long Intergenic Non-Protein Coding RNA 1093
MIA-RAB4B	MIA-RAB4B Readthrough (NMD Candidate)
MIR4458HG	MIR4458 Host Gene
LINC02418	Long Intergenic Non-Protein Coding RNA 2418
MIR591	MicroRNA 591
MIR4306	MicroRNA 4306
[truncated: 2,523 more rows]
