# Supplementary material
Source: Research Square preprint supplement (doi:10.21203/rs.3.rs-8455901/v1)
Supplement: Supplementary file 3 [file 5be8d4b61d598ea3233e999e.xlsx]

## Sheet: Sheet2
Table S3 Among the 1000 selected liver cancer related targets, 57 are predicted targets for 5 compounds.
Targets
MAPK10
GSTP1
TTR
NR1H2
CTSD
CHEK1
HSP90AA1
F2
MAPK8
EGFR
TGFBR2
PPARG
CDK2
ESR2
CCNA2
MAPK1
ESR1
PGR
EPHB4
DHFR
PAH
SRC
KDR
BMP7
PYGL
MAPK14
AR
ALDH2
ALB
CYP19A1
BMP2
PPARD
TYMS
CDK6
NOS3
TGFBR1
PRKACA
CASP3
PTPN11
GSK3B
RXRA
SOD2
AURKA
PARP1
CTNNA1
MET
NR3C1
XIAP
PIK3CG
TYMP
ADH1B
NQO1
FGFR1
PLAU
SERPINA1
JAK3
PLK1
