# Supplementary material
Source: Research Square preprint supplement (doi:10.21203/rs.3.rs-8455901/v1)
Supplement: Supplementary file 4 [file 9f0b0cff284cc94ab977605c.xlsx]

## Sheet: Recording of tumor volume
Record of tumor volume in tumor-bearing mice
Groups	No.	Time
			Jan. 21st	Jan. 23st	Jan. 25st	Jan. 27st	Jan. 29st
Model	1	length (mm)	7.02	8.59	10.09	13.76	16.28
		width (mm)	6.26	6.74	9.86	12.1	14.37
	volume (mm3)		137.548	195.112	490.473	1007.3	1680.88
	2	length (mm)	7.59	10.9	12.95	13.77	17.22
		width (mm)	6.7	7.19	11.13	13.35	16.92
	volume (mm3)		170.358	281.744	802.103	1227.06	2464.93
	3	length (mm)	7.51	12.64	13.92	14.22	16.9
		width (mm)	6.98	9.99	13.18	13.72	14.69
	volume (mm3)		182.945	630.737	1209.04	1338.38	1823.48
	4	length (mm)	7.54	8.77	9.98	14.22	20.85
		width (mm)	5.33	7.16	9.86	13.72	13.56
	volume (mm3)		107.102	224.8	485.126	1338.38	1916.88
	5	length (mm)	6.88	7.92	10.91	13.26	16.66
		width (mm)	6.56	7.68	9.11	11.28	15.94
	volume (mm3)		148.036	233.57	452.722	843.591	2116.52
	6	length (mm)	6.96	8.8	12.41	16.05	17.48
		width (mm)	6.37	8.65	11.71	14.17	15.82
	volume (mm3)		141.208	329.219	850.855	1611.33	2187.38
	7	length (mm)	7.92	9.18	12.56	14.41	16.39
		width (mm)	7.01	8.35	12.12	12.65	14.66
	volume (mm3)		194.595	320.026	922.497	1152.96	1761.23
	8	length (mm)	8.42	12.53	13.45	15.6	18.01
		width (mm)	7.13	10.21	12.08	11.5	17.91
	volume (mm3)		214.023	653.089	981.355	1031.55	2888.52
	9	length (mm)	9.11	9.72	12.58	12.4	13.25
		width (mm)	7.07	7.72	7.5	9.25	10.25
	volume (mm3)		227.681	289.648	353.812	530.487	696.039
	10	length (mm)	7.79	9.35	13.29	15.3	16.62
		width (mm)	7.71	8.56	8.79	13.37	14.85
	volume (mm3)		231.535	342.554	513.42	1367.49	1832.54
Huaier	1	length (mm)	7.1	9.14	13.45	15.44	17.07
		width (mm)	6.81	8.65	13.1	15.34	15.68
	volume (mm3)		164.635	341.939	1154.08	1816.64	2098.44
	2	length (mm)	7.3	10.07	12.17	16.93	17.41
		width (mm)	6.52	7.48	9.58	10.23	12.49
	volume (mm3)		155.163	281.71	558.459	885.887	1357.98
	3	length (mm)	7.63	9.81	11.89	11.99	12.48
		width (mm)	7.34	9.33	10.89	11.79	11.36
	volume (mm3)		205.535	426.975	705.03	833.33	805.27
	4	length (mm)	8.45	11.32	15.78	15.58	15.73
		width (mm)	5.87	7.24	9.67	10.16	10.23
	volume (mm3)		145.58	296.684	737.785	804.127	823.095
	5	length (mm)	7.07	9.01	13.66	14.42	16.6
		width (mm)	6.8	7.37	9.02	11	11.64
	volume (mm3)		163.458	244.698	555.692	872.41	1124.56
	6	length (mm)	8.45	10.25	12.6	13.03	13.99
		width (mm)	7.62	8.67	12.39	11.61	11.59
	volume (mm3)		245.322	385.241	967.126	878.171	939.625
	7	length (mm)	8.28	11.28	death
		width (mm)	7.34	7.91	death
	volume (mm3)		223.045	352.884
	8	length (mm)	7.38	9.15	13.33	death
		width (mm)	7.01	8.34	12.73	death
	volume (mm3)		181.327	318.217	1080.08
	9	length (mm)	7.38	9.76	11.63	11.63	15.85
		width (mm)	7.01	9.27	10.53	11.49	12.7
	volume (mm3)		181.327	419.353	644.772	767.697	1278.22
	10	length (mm)	7.55	9.36	12.72	12.38	14.13
		width (mm)	7.16	9.31	10.96	10.83	12.86
	volume (mm3)		193.528	405.644	763.973	726.018	1168.41
Adriamycin	1	length (mm)	7.38	7.88	8.14	8.95	8.95
		width (mm)	7.36	7.79	7.8	7.48	7.31
	volume (mm3)		199.886	239.095	247.619	250.378	239.127
	2	length (mm)	6.71	7.28	7.05	7.62	8.85
		width (mm)	5.83	6.74	6.99	7.6	8.45
	volume (mm3)		114.033	165.356	172.232	220.066	315.956
	3	length (mm)	6.48	7.06	8.37	8.35	9.17
		width (mm)	6.45	6.99	7.89	7.25	8.6
	volume (mm3)		134.792	172.476	260.525	219.448	339.107
	4	length (mm)	7.26	7.43	8.35	8.34	8.77
		width (mm)	6.79	6.88	6.85	7.87	8.69
	volume (mm3)		167.358	175.847	195.901	258.277	331.138
	5	length (mm)	7.22	7.89	7.69	7.36	7.78
		width (mm)	7.11	7.33	7.6	7.3	7.57
	volume (mm3)		182.493	211.961	222.087	196.107	222.916
	6	length (mm)	7.39	8.02	7.65	7.91	7.6
		width (mm)	6.88	7.14	7.36	7.16	6.77
	volume (mm3)		174.901	204.428	207.199	202.755	174.165
	7	length (mm)	7.1	7.68	8.13	8.42	8.42
		width (mm)	6.43	6.95	7.28	7.81	7.31
	volume (mm3)		146.774	185.482	215.438	256.794	224.966
	8	length (mm)	7	8.09	8.56	8.94	9.13
		width (mm)	5.12	6.31	7.46	7.83	7.55
	volume (mm3)		91.7504	161.056	238.189	274.051	260.216
	9	length (mm)	7.47	7.15	9.92	9.85	9.38
		width (mm)	6.79	7.05	7.36	7.25	7.52
	volume (mm3)		172.199	177.686	268.681	258.87	265.221
	10	length (mm)	6.91	7.45	7.7	7.74	7.75
		width (mm)	6.47	7.21	7.29	7.16	7.07
	volume (mm3)		144.629	193.641	204.605	198.398	193.691
High-dose	1	length (mm)	7.43	8.68	9.04	9.46	9.65
		width (mm)	6.73	8.04	7.58	8.7	9.51
	volume (mm3)		168.263	280.545	259.703	358.014	436.373
	2	length (mm)	6.25	8.49	8.95	9.55	10.16
		width (mm)	6.33	8.46	7.8	7.31	7.78
	volume (mm3)		125.215	303.821	272.259	255.157	307.484
	3	length (mm)	7.36	8.69	8.03	9.1	9.66
		width (mm)	6.56	8.64	8.05	7.94	8.17
	volume (mm3)		158.364	324.353	260.182	286.848	322.397
	4	length (mm)	6.79	8.63	8.07	8.7	9.78
		width (mm)	6.75	7.06	8.12	7.95	7.96
	volume (mm3)		154.685	215.075	266.045	274.931	309.838
	5	length (mm)	7.58	8.96	8.21	9.38	9.35
		width (mm)	7.25	7.77	8.55	8.4	8.84
	volume (mm3)		199.212	270.471	300.086	330.926	365.331
	6	length (mm)	6.71	8.44	8.11	7.79	7.83
		width (mm)	6.1	7.65	7.52	7.79	8.17
	volume (mm3)		124.84	246.965	229.312	236.365	261.322
	7	length (mm)	7.55	9.21	9.77	9.32	9.89
		width (mm)	7.42	8.75	8.61	8.65	8.8
	volume (mm3)		207.838	352.57	362.135	348.673	382.941
	8	length (mm)	7.05	9.94	9.12	9.37	9.28
		width (mm)	6.43	8.92	7.51	8.79	9.34
	volume (mm3)		145.741	395.445	257.184	361.982	404.773
	9	length (mm)	6.98	9.41	9.88	9.72	9.41
		width (mm)	6.71	7.89	8.26	8.27	8.38
	volume (mm3)		157.134	292.896	337.044	332.389	330.406
	10	length (mm)	7.05	9.67	8.99	9.37	9.71
		width (mm)	7.04	8.63	7.69	8.33	8.65
	volume (mm3)		174.705	360.096	265.817	325.087	363.263
Middle-dose	1	length (mm)	7.18	9.65	10.56	10.18	10.92
		width (mm)	6.34	8.9	9.02	9.9	10.18
	volume (mm3)		144.302	382.188	429.583	498.871	565.833
	2	length (mm)	7.18	9.44	10.8	10.77	11.02
		width (mm)	6.87	8.92	8.67	10.17	10.61
	volume (mm3)		169.437	375.553	405.912	556.965	620.272
	3	length (mm)	7.65	9.71	10.99	11.79	10.89
		width (mm)	7.24	8.43	8.2	10.32	8.62
	volume (mm3)		200.497	345.02	369.484	627.832	404.587
	4	length (mm)	7.48	10.08	9.47	12.37	10.8
		width (mm)	7.21	9.17	8.9	9.35	10.12
	volume (mm3)		194.421	423.808	375.059	540.708	553.038
	5	length (mm)	7.93	9.51	10.09	12.34	12.25
		width (mm)	7.75	8.03	9.56	9.83	10.89
	volume (mm3)		238.148	306.607	461.081	596.2	726.377
	6	length (mm)	7.38	10.67	10.77	11.34	12.08
		width (mm)	7.31	9.53	9.56	9.91	10.67
	volume (mm3)		197.179	484.53	492.155	556.84	687.647
	7	length (mm)	6.99	10.28	10.63	11.25	10.94
		width (mm)	6.47	9.82	9.96	9.87	10.18
	volume (mm3)		146.304	495.663	527.257	547.97	566.869
	8	length (mm)	6.85	10.51	9.2	10.7	10.81
		width (mm)	6.3	8.51	8.85	9.31	10.78
	volume (mm3)		135.938	380.568	360.284	463.717	628.106
	9	length (mm)	7.52	9.97	10.41	11.57	11.85
		width (mm)	6.13	9.06	9.85	10.25	10.55
	volume (mm3)		141.289	409.187	505.002	607.787	659.467
	10	length (mm)	7.02	9.14	10.32	11.13	10.28
		width (mm)	6.19	8.7	9.11	10.96	9.74
	volume (mm3)		134.49	345.903	428.239	668.477	487.619
Low-dose	1	length (mm)	7.53	11.08	11.43	12.42	13.75
		width (mm)	7	7.33	7.68	8.26	9.89
	volume (mm3)		184.485	297.658	337.084	423.693	672.458
	2	length (mm)	7.58	11.97	10.18	11.62	12.01
		width (mm)	7.39	9.89	9.18	10.43	11.72
	volume (mm3)		206.98	585.405	428.947	632.04	824.837
	3	length (mm)	7.42	11.65	13.24	12.25	13.49
		width (mm)	7.32	10.85	12.15	11.12	12.12
	volume (mm3)		198.791	685.734	977.261	757.383	990.803
	4	length (mm)	8.09	15.25	13.55	15.88	14.25
		width (mm)	6.86	7.05	8.24	10.68	11.23
	volume (mm3)		190.356	378.982	460.006	905.655	898.554
	5	length (mm)	6.56	10.31	13.71	14.12	14.29
		width (mm)	6.09	8.55	9.42	10.6	10.88
	volume (mm3)		121.649	376.843	608.288	793.262	845.785
	6	length (mm)	11.71	14.53	13.58	12.42	17.99
		width (mm)	6.91	7.2	7.41	6.5	9.07
	volume (mm3)		279.565	376.618	372.826	262.373	739.973
	7	length (mm)	6.92	9.77	11.86	11.23	13.16
		width (mm)	6.65	8.51	10.52	11.06	10.65
	volume (mm3)		153.01	353.772	656.275	686.847	746.32
	8	length (mm)	7.12	8.37	12.14	12.18	15.53
		width (mm)	5.51	7.95	11.54	11.84	12.99
	volume (mm3)		108.082	264.502	808.352	853.73	1310.27
	9	length (mm)	7.13	9.84	10.62	12.78	13.82
		width (mm)	7.07	9.06	10.73	12.35	12.81
	volume (mm3)		178.196	403.851	611.356	974.619	1133.9
	10	length (mm)	8.07	9.74	13.41	15.78	16.62
		width (mm)	6.52	8.99	12.6	14.44	14.61
	volume (mm3)		171.529	393.594	1064.49	1645.17	1773.79
